# Supplementary material for: Lapses in perceptual decisions reflect exploration
Source: eLife. 2021 Jan 11;10:e55490. doi: 10.7554/eLife.55490 (PMC7846276; doi:10.7554/eLife.55490)
Supplement: Figure 4—source data 1. [file elife-55490-fig4-data1.xlsx]

## Sheet: Table 1 - Pooled parameters
EXPERIMENT	CONDITIONS	MODALITY	MODELS
			No lapse		Fixed lapse				Restricted lapse				Variable lapse
Multisensory			Mu	Sigma	Mu	Sigma	pLapse	lapseBias	Mu	Sigma	pLapse	lapseBias	Mu	Sigma	pLapse	lapseBias
(descriptive:		Auditory	12.4602	3.42948	12.5947	3.13116	0.063367	0.691442	12.4602	3.42948	1.1862e-09	0.0491476	12.6955	2.23263	0.246479	0.0402514
no optimality constraint)		Multisensory	12.009	1.8654	12.0981	1.57847	0.063367	0.691442	11.9794	1.82262	0.00714435	0.1	12.1332	1.57347	0.066078	0.0333664
		Visual	12.8152	2.93973	12.9369	2.65394	0.063367	0.691442	12.4569	2.56109	0.0904145	0.1	12.5374	2.15899	0.176076	-0.0567225
			Ideal observer		Fixed motor error				Inattention				Exploration
Multisensory			Mu	Sigma	Mu	Sigma	pError	errorBias	Mu	Sigma	pInattention	guessBias	Mu	Sigma	Beta	rewardBias
(theoretical:		Auditory	12.461	3.2798	12.6085	3.20618	0.0167361	0.0271608	12.6973	2.25486	0.24238	0.583856	12.8629	1.85243	4.25899	0.553259
includes optimality constraint)		Multisensory	12.0023	2.12028	12.1068	2.06492	0.0167361	0.0271608	12.1351	1.56554	0.0674575	0.751405	12.3892	1.29904	6.9344	0.582499
		Visual	12.8071	2.77908	12.9458	2.69928	0.0167361	0.0271608	12.5383	2.17531	0.172866	0.336492	12.2648	1.82219	5.16323	0.419144
Neutral
(theoretical)		Auditory	12.824	2.94555	13.137	2.62423	0.0670484	0.0612814	12.8286	2.58408	0.106059	0.489256	12.688	1.70678	4.55668	0.476246
		Multisensory	12.1255	2.19471	12.3459	1.95285	0.0670484	0.0612814	12.333	1.43869	0.108671	0.755679	12.5672	1.16823	6.13211	0.596282
		Neutral	12.2883	2.94555	12.5976	2.62423	0.0670484	0.0612814	12.8271	2.58408	0.108671	1	13.1728	1.70678	4.55668	0.63129
		Visual	13.0226	3.29063	13.36	2.92344	0.0670484	0.0612814	12.6172	1.73194	0.361903	0.387071	12.472	1.60242	3.55064	0.413296
Increased reward			Mu	Sigma	Mu	Sigma	pError	errorBias	Mu	Sigma	pInattention	guessBias	Mu	Sigma	Beta*rL	Beta*rR
(theoretical)	Equal reward	Auditory	13.4697	2.86146	13.4697	2.86146	3.55043e-08	0.273038	13.9499	2.34889	0.0858568	1	13.1155	1.63291	2.33228	1.6962
	Inc. reward rR	Auditory	12.4333	2.86146	12.4333	2.86146	3.55043e-08	0.273038	12.7565	2.34889	0.0858568	0.931483	13.1155	1.63291	2.33228	3.74242
Decreased reward
(theoretical)	Equal reward	Auditory	12.464	3.51201	12.9109	2.68704	0.142355	0.817827	12.9081	2.79758	0.114213	0.8957	13.2299	1.84782	1.94359	3.06806
	Dec. reward rR	Auditory	13.2433	3.51201	13.7645	2.68704	0.142355	0.817827	13.8819	2.79758	0.114213	0.999991	13.2299	1.84782	1.94359	1.83647
Probabilistic reward			Mu	Sigma	Mu	Sigma	pError	errorBias	Mu	Sigma	pInattention	guessBias	Mu	Sigma	Beta*(rLoL-rLoR)	Beta*(rHiR-rHiL)
(theoretical)	p(rHiL) = 0	Visual	12.3761	2.72666	12.0025	1.97338	0.164209	0.271118	12.3761	2.72666	4.92951e-09	0.973925	11.786	1.60233	3.28142	2.24795
	p(rHiL) = 0.5	Visual	12.9035	2.72666	12.5217	1.97338	0.164209	0.271118	12.9035	2.72666	4.92951e-09	0.308735	11.786	1.60233	3.28142	1.63003
Inactivation
AREA	INAC. SIDE	MODALITY	MODELS
			Exploration - biased evidence						Exploration - biased value						Exploration - biased effort
			Mu	Sigma	Beta*rL	Beta*rR	kSaline	kMuscimol	Mu	Sigma	Beta*rL	Beta*rR	kSaline	kMuscimol	Mu	Sigma	Beta*rL	Beta*rR	kSaline	kMuscimol
M2	High rate	Auditory	11.5105	2.50276	5.48684	2.03081	-1.42726e-24	-0.904522	13.2624	1.82996	2.74217	2.43704	1	0.241979	15	2.4254	2.6588	5.87707	1.1553e-25	1.65937
		Multisensory	12.5549	1.68032	2.79668	4.61062	6.69523e-25	-0.904522	12.5294	1.25005	2.39453	4.48346	1	0.241979	13.2544	1.70138	2.94805	10	1.29248e-25	1.65937
		Visual	10.6659	2.26732	7.43762	2.14891	-9.03136e-26	-0.904522	12.2537	1.71163	3.22122	2.27603	1	0.241979	15	2.38729	2.63134	8.96154	1.84387e-25	1.65937
M2	Low rate	Auditory	13.9971	2.66936	2.3026	3.58809	-6.01488e-21	0.444867	13.1575	2.15422	2.21142	2.35173	1	0.51096	12.8689	2.38639	2.3171	2.27565	1.63922e-25	-0.762408
		Multisensory	11.6338	1.76697	4.37673	3.50277	-8.68737e-21	0.444867	12.1029	1.40324	3.14356	3.71076	1	0.51096	11.616	1.56677	4.05392	3.03198	6.46085e-26	-0.762408
		Visual	11.8721	2.35736	4.11265	2.50687	-1.30657e-20	0.444867	11.8732	1.84942	3.5676	2.09764	1	0.51096	10.8017	2.07715	5.93737	1.85713	3.29804e-26	-0.762408
pStr	High rate	Auditory	12.8256	1.97323	2.1519	2.01944	-1.01127e-10	-0.574538	12.9026	2.07502	2.42578	2.32972	1	0.492026	15	3.04165	3.17566	8.1968	-9.28395e-12	1.06382
		Multisensory	13.2779	1.71714	1.31179	3.90001	-3.55248e-11	-0.574538	12.6042	1.6106	1.9807	3.66809	1	0.492026	12.4338	2.37349	3.68311	5.82887	2.09941e-12	1.06382
		Visual	4.91589	3.48537	98.0599	1.6719	1.45418e-10	-0.574538	12.2009	2.55447	2.76571	1.85517	1	0.492026	14.7571	3.79535	2.9674	5.10904	8.94936e-12	1.06382
pStr	Low rate	Auditory	15.454	3.87659	4.50457	16.2041	-1.43734e-08	0.503799	14.355	2.25973	1.69086	4.46081	1	0.291488	11.979	2.85712	2.90643	2.52704	1.46844e-12	-1.1687
		Multisensory	15.9194	2.9245	3.52063	28.4678	-1.42349e-08	0.503799	12.9308	1.61965	2.23527	3.98936	1	0.291488	10.4976	2.14362	7.77747	2.63867	5.61244e-13	-1.1687
		Visual	13.4115	4.45175	12.2204	10.6409	-1.99587e-10	0.503799	13.2394	2.32264	2.67246	2.11545	1	0.291488	10	3.24234	7.76731	1.68	2.26692e-12	-1.1687

## Sheet: Table 2 - Individual parameters
Experiment	Individuals	Modality	Models
Multisensory			No lapse		Fixed lapse				Restricted lapse				Variable lapse
(descriptive: no optimality constraint)			Mu	Sigma	Mu	Sigma	pLapse	lapseBias	Mu	Sigma	pLapse	lapseBias	Mu	Sigma	pLapse	lapseBias
	1	Auditory	12.7114	3.81905	12.5528	3.67112	0.0328684	0.0721343	12.7113	3.81901	8.79707e-06	-0.0113645	12.7112	3.81862	9.34171e-05	0.362473
		Multisensory	12.276	1.99148	12.1472	1.83429	0.0328684	0.0721343	12.1635	1.84487	0.0302836	0.0999953	12.1732	1.825	0.0350559	0.189682
		Visual	12.5162	3.97081	12.3494	3.79962	0.0328684	0.0721343	11.8088	3.39784	0.0999999	-0.0999993	11.64	3.12405	0.148419	0.000700965
	2	Auditory	12.243	4.73679	12.5221	4.28915	0.0795705	0.750628	12.243	4.73679	7.6661e-08	0.0114523	13.2466	2.29726	0.395633	0.663504
		Multisensory	11.7786	1.94369	11.9265	1.58223	0.0795705	0.750628	11.7538	1.90802	0.00517715	0.0999975	11.9995	1.51557	0.0989481	0.799423
		Visual	12.952	2.72847	13.1759	2.34178	0.0795705	0.750628	12.6688	2.44615	0.071546	0.0999997	12.7511	1.93613	0.175721	0.366967
	3	Auditory	12.2119	5.11555	11.8574	4.98949	0.0159144	-0.999982	11.7804	4.64655	0.071493	0.0999999	12.4671	2.21164	0.455048	0.539268
		Multisensory	11.1118	2.31847	10.8393	2.0063	0.0159144	-0.999982	10.9246	1.98675	0.0312944	0.0999996	11.0464	1.86452	0.0731947	0.578137
		Visual	12.9572	3.81747	12.6665	3.74433	0.0159144	-0.999982	12.2058	3.29942	0.1	-0.1	11.5318	2.5578	0.218686	5.56164e-05
	4	Auditory	11.8661	5.06332	11.8661	5.06332	9.11414e-09	0.339889	11.8661	5.06329	4.32517e-06	0.0356108	12.2551	3.57331	0.255167	0.609203
		Multisensory	12.0174	2.07201	12.0174	2.07201	9.11414e-09	0.339889	12.0174	2.07201	4.03489e-09	0.00687686	12.6202	1.63418	0.107964	0.999998
		Visual	12.3982	3.22521	12.3982	3.2252	9.11414e-09	0.339889	12.1762	2.98546	0.0479288	0.0999991	12.4513	2.18551	0.216544	0.52669
	5	Auditory	12.9296	4.47487	12.6702	4.2131	0.0524313	0.127066	12.9296	4.47487	1.20814e-07	0.0289115	12.8952	3.00461	0.265741	0.478327
		Multisensory	12.0977	1.90266	11.7893	1.54665	0.0524313	0.127066	11.8207	1.59365	0.0432063	0.0999997	11.8327	1.56769	0.0487047	0.180889
		Visual	12.678	2.61112	12.4589	2.36669	0.0524313	0.127066	12.2009	2.13304	0.1	0.0779736	12.213	2.01421	0.125581	0.178011
	6	Auditory	12.7747	3.83595	13.1365	3.4184	0.0746545	0.866178	12.7747	3.83595	5.20678e-07	0.0360402	12.8794	2.61711	0.236642	0.514919
		Multisensory	11.1262	2.44765	11.3349	2.19419	0.0746545	0.866178	11.1262	2.44765	3.62751e-07	0.0333691	11.5604	1.98094	0.139099	0.890655
		Visual	12.842	4.72939	13.2223	4.28752	0.0746545	0.866178	12.0032	4.14334	0.0999999	-0.0999992	11.8372	2.97182	0.296734	0.270159
	7	Auditory	12.0783	3.70163	12.0472	3.38923	0.0641322	0.457269	12.0783	3.70163	3.52942e-08	0.0126274	12.6412	2.26013	0.291332	0.665655
		Multisensory	12.0892	2.22228	12.0401	1.92355	0.0641322	0.457269	11.95	2.08274	0.0229973	-0.099998	11.9583	2.0729	0.0256487	0.000144953
		Visual	12.3527	3.5161	12.3199	3.20448	0.0641322	0.457269	11.9142	2.98385	0.0999998	0.0999999	12.3827	1.81284	0.334001	0.510471
	8	Auditory	12.2648	3.6321	12.2648	3.6321	1.01477e-06	0.488286	11.9803	3.30417	0.063072	0.0999953	12.2365	2.46502	0.238512	0.49658
		Multisensory	11.1853	2.01807	11.1853	2.01807	1.01477e-06	0.488286	11.1853	2.01807	4.88643e-08	0.00814216	11.7925	1.48949	0.180061	0.962694
		Visual	12.8904	3.42506	12.8904	3.42506	1.01477e-06	0.488286	12.243	2.96586	0.0999992	-0.0999958	12.2283	2.86149	0.122347	6.52592e-06
	9	Auditory	11.552	3.36716	11.552	3.36716	1.46142e-08	0.460802	11.4891	3.27969	0.0146032	0.0999981	11.9702	2.38536	0.220757	0.697228
		Multisensory	11.6609	1.65701	11.6609	1.65701	1.46142e-08	0.460802	11.6609	1.65701	1.16179e-09	0.00860138	11.863	1.45466	0.0535962	1
		Visual	12.9184	2.79522	12.9184	2.79522	1.46142e-08	0.460802	12.9184	2.79521	2.90667e-07	0.0240327	12.9283	2.75572	0.00886065	0.600965
	10	Auditory	12.5138	4.33971	12.6436	4.05908	0.0527793	0.692184	12.5138	4.33971	9.59431e-08	0.0248731	13.3893	3.49715	0.139501	0.999807
		Multisensory	11.789	1.93052	11.8506	1.70433	0.0527793	0.692184	11.741	1.85452	0.0120664	0.099997	11.8655	1.68444	0.0583915	0.709883
		Visual	13.0514	3.15217	13.159	2.89712	0.0527793	0.692184	12.912	3.018	0.0355264	0.0999968	12.9017	2.71832	0.101949	0.343129
	11	Auditory	12.8091	2.87112	12.9452	2.64571	0.0437469	0.796784	12.8091	2.87112	5.58069e-09	0.0349091	12.8091	2.87112	4.58757e-10	0.134389
		Multisensory	12.1822	1.57295	12.2887	1.35716	0.0437469	0.796784	12.1822	1.57295	6.64612e-09	0.0387977	12.2983	1.37982	0.0388212	0.866394
		Visual	12.7801	2.40702	12.8971	2.21313	0.0437469	0.796784	12.5408	2.13872	0.067253	0.1	12.6059	1.87407	0.124237	0.337628
	12	Auditory	12.6587	2.13747	12.7953	1.89579	0.0490449	0.780323	12.6587	2.13747	2.12044e-09	0.0208079	12.8388	1.80991	0.0689404	0.771133
		Multisensory	12.1552	1.55239	12.2666	1.30189	0.0490449	0.780323	12.1422	1.53094	0.00329016	0.0999998	12.2656	1.3203	0.0446143	0.802306
		Visual	12.859	3.10145	12.997	2.87692	0.0490449	0.780323	12.4323	2.67219	0.1	0.0795852	12.4135	2.18875	0.202691	0.283872
	13	Auditory	11.9115	2.72846	12.0951	2.52297	0.0535997	0.864328	11.9115	2.72846	1.7546e-09	0.0156801	12.4413	1.9458	0.19029	0.796602
		Multisensory	12.0197	1.55962	12.1685	1.32591	0.0535997	0.864328	12.014	1.54843	0.00142961	0.0999997	12.1694	1.33668	0.0513152	0.881646
		Visual	12.7343	2.35627	12.9105	2.13043	0.0535997	0.864328	12.6468	2.25281	0.0252359	0.1	12.7244	1.91492	0.102094	0.476906
	14	Auditory	12.9025	2.54107	12.9366	2.47946	0.0118685	0.780586	12.9025	2.54107	3.374e-09	0.0254933	13.0214	2.07968	0.0988313	0.605698
		Multisensory	12.3045	1.59161	12.3323	1.53401	0.0118685	0.780586	12.3045	1.59161	3.93453e-09	0.0229351	12.342	1.53865	0.0112191	0.896958
		Visual	13.4773	2.81942	13.5094	2.75726	0.0118685	0.780586	12.9115	2.5176	0.1	-0.0967042	12.694	1.97851	0.219262	0.121182
	15	Auditory	11.7425	3.24451	11.7412	3.01478	0.0478661	0.516199	11.5189	2.92109	0.0532496	0.0999907	11.9406	2.21619	0.221481	0.607517
		Multisensory	11.6788	2.05041	11.6672	1.83051	0.0478661	0.516199	11.6386	1.98272	0.010168	0.0999542	11.7438	1.8465	0.0499681	0.707467
		Visual	12.3005	3.24012	12.3019	3.0236	0.0478661	0.516199	11.8748	2.72862	0.0999964	0.0999915	12.3005	3.24012	3.61748e-08	0.894914
	16	Auditory	12.503	3.61079	12.3096	3.45621	0.033659	-0.025746	12.503	3.61079	5.2755e-10	0.0173982	12.7821	2.62899	0.202431	0.619892
		Multisensory	12.2842	1.65889	12.1217	1.4615	0.033659	-0.025746	12.1604	1.46316	0.0310512	0.1	12.1616	1.4611	0.0314913	0.110592
		Visual	13.0175	2.24487	12.8597	2.11683	0.033659	-0.025746	12.6263	1.86359	0.1	0.0514528	12.6164	1.8334	0.107176	0.0695791
	17	Auditory	12.7877	3.61506	12.7527	3.36972	0.0529029	0.431553	12.7877	3.61506	4.2011e-08	0.0171304	13.0175	2.73076	0.178411	0.606351
		Multisensory	12.045	1.81584	11.9896	1.54238	0.0529029	0.431553	11.9423	1.66021	0.0250559	0.0999997	12.0068	1.55499	0.0499597	0.473539
		Visual	12.7678	2.78827	12.7319	2.5599	0.0529029	0.431553	12.3994	2.38607	0.0956642	0.0999999	12.4598	2.11592	0.153995	0.292344
Experiment	Individuals	Modality	Models
Multisensory			Ideal observer		Fixed lapse				Inattention				Exploration
(theoretical: optimality constraint)			Mu	Sigma	Mu	Sigma	pLapse	lapseBias	Mu	Sigma	pLapse	lapseBias	Mu	Sigma	Beta	rewardBias
	1	Auditory	12.6916	3.3767	12.6916	3.3767	2.024e-08	-0.0439146	12.6423	3.02976	0.16208	0.459789	12.5795	3.04101	7.22811	0.485632
		Multisensory	12.2702	2.43058	12.2702	2.43058	2.0253e-08	-0.0439146	12.1718	1.89113	0.0226511	8.35818e-06	9.4601	1.81664	53.0345	0.0719826
		Visual	12.5108	3.50143	12.5108	3.50143	2.02045e-08	-0.0439146	11.8662	2.42056	0.287525	0.318813	11.0801	2.26525	4.85997	0.333139
	2	Auditory	12.2524	4.53721	12.2524	4.53721	3.21192e-08	0.381438	13.2627	2.35679	0.386505	0.671279	13.661	1.91387	3.23618	0.660021
		Multisensory	11.7679	2.21615	11.7679	2.21615	3.2142e-08	0.381438	12.0013	1.50417	0.100813	0.797311	12.3043	1.22844	6.28256	0.613158
		Visual	12.9485	2.53972	12.9485	2.53972	3.21228e-08	0.381438	12.7538	1.95385	0.172408	0.36632	12.5785	1.60198	4.98464	0.437654
	3	Auditory	12.2214	4.82762	12.2213	4.82745	8.90806e-06	0.25323	12.4505	2.42068	0.428023	0.539481	12.5276	3.18659	4.63	0.529144
		Multisensory	11.0797	2.83342	11.0797	2.83336	8.93121e-06	0.25323	11.1135	1.76586	0.0998122	0.664752	9.351	1.84694	17.4183	0.206609
		Visual	12.9376	3.49958	12.9376	3.49953	8.9054e-06	0.25323	11.5503	2.58169	0.216158	1.17026e-06	9.6938	2.26646	8.48643	0.158556
	4	Auditory	11.8984	4.80239	11.8984	4.80239	8.81975e-09	0.421365	12.3235	2.93139	0.355599	0.592735	12.5259	2.84863	4.0711	0.56569
		Multisensory	11.981	2.49763	11.981	2.49763	8.81975e-09	0.421365	12.589	1.66497	0.103431	1	13.9718	1.47625	12.3474	0.826046
		Visual	12.4335	2.92423	12.4335	2.92423	8.81975e-09	0.421365	12.4681	2.02295	0.245466	0.52947	12.4897	1.72613	4.30437	0.51427
	5	Auditory	12.9262	4.36145	12.6443	4.29947	0.0141026	-0.999991	12.8549	2.81551	0.297995	0.469454	12.9821	2.64963	4.42524	0.501947
		Multisensory	12.0999	2.12651	11.9011	2.05342	0.0141026	-0.999991	11.8316	1.6094	0.0418698	0.101108	10.6948	1.47367	13.5462	0.234598
		Visual	12.6851	2.43564	12.4331	2.33721	0.0141026	-0.999991	12.2156	1.96144	0.135576	0.206288	11.5381	1.77324	6.81023	0.334779
	6	Auditory	12.7652	3.64733	12.7652	3.64733	6.31084e-09	0.22926	12.8811	2.62661	0.234896	0.515781	16.0571	3.24493	15.3336	0.812261
		Multisensory	11.113	2.80173	11.113	2.80173	6.31141e-09	0.22926	11.563	1.97613	0.140178	0.890155	11.3549	2.37241	19.6158	0.537413
		Visual	12.8212	4.37594	12.8212	4.37594	6.31075e-09	0.22926	11.83	2.99974	0.292007	0.264284	6.23596	3.47731	30.693	0.0537325
	7	Auditory	12.0988	3.54429	12.0165	3.50558	0.00497657	-0.999985	12.6197	3.1017	0.133977	0.856228	18.9581	3.10627	99.9677	0.978163
		Multisensory	12.0644	2.43693	11.9977	2.41008	0.00497657	-0.999985	12.03	1.83292	0.0745808	0.44819	12.0043	1.53925	6.54752	0.489132
		Visual	12.3648	3.35609	12.2841	3.31882	0.00497657	-0.999985	12.3067	2.27208	0.255469	0.487788	12.2813	1.77212	3.9243	0.491566
	8	Auditory	12.2731	3.47337	12.2731	3.47337	3.30411e-08	0.417229	12.2734	2.08938	0.30659	0.510159	12.2448	1.84818	3.90813	0.500103
		Multisensory	11.132	2.3788	11.132	2.3788	3.30415e-08	0.417229	11.6861	1.63504	0.146765	0.972534	13.5984	1.5243	18.0934	0.899044
		Visual	12.8797	3.26459	12.8797	3.26459	3.30411e-08	0.417229	12.2273	2.62617	0.169546	0.14173	8.07023	2.69551	33.808	0.0598255
	9	Auditory	11.5731	3.18449	11.5731	3.18449	1.10011e-08	0.426453	12.0828	1.97303	0.298279	0.685623	12.311	1.78129	4.18488	0.613465
		Multisensory	11.6781	2.00972	11.6781	2.00972	1.10011e-08	0.426453	11.8238	1.52626	0.0428083	1	14.5741	1.42021	99.9822	0.970454
		Visual	12.9011	2.59084	12.9011	2.59084	1.10011e-08	0.426453	12.8414	2.4084	0.0888276	0.394951	12.803	2.35293	8.57842	0.482933
	10	Auditory	12.5123	4.04894	12.5123	4.04894	3.06042e-09	0.301197	13.0941	2.66311	0.298598	0.646313	13.5859	2.28463	4.11634	0.621017
		Multisensory	11.7634	2.35929	11.7634	2.35929	3.06042e-09	0.301197	11.8211	1.79364	0.0353825	0.665817	12.0288	1.52991	8.01724	0.551695
		Visual	13.0235	2.90306	13.0235	2.90306	3.06042e-09	0.301197	12.8376	2.42655	0.164335	0.360515	12.6158	2.06	5.33483	0.438295
	11	Auditory	12.8026	2.77382	12.8026	2.77382	6.71974e-09	0.0945937	13.0515	2.10144	0.159644	0.635234	13.3703	1.80094	5.48479	0.580022
		Multisensory	12.1918	1.77196	12.1918	1.77196	6.71974e-09	0.0945937	12.2963	1.39115	0.0373051	0.873368	12.6174	1.18781	8.47963	0.606065
		Visual	12.775	2.30317	12.775	2.30317	6.71974e-09	0.0945937	12.6041	1.85609	0.127746	0.340402	12.3927	1.58026	5.82584	0.433288
	12	Auditory	12.6566	2.06725	12.6566	2.06725	4.39766e-09	0.0833224	12.8356	1.77546	0.0756736	0.740311	13.175	1.54378	7.1823	0.592352
		Multisensory	12.1535	1.70768	12.1535	1.70768	4.40164e-09	0.0833224	12.2598	1.35391	0.0402842	0.815666	12.5208	1.15234	8.1776	0.589792
		Visual	12.8548	3.03008	12.8548	3.03008	4.3968e-09	0.0833224	12.4098	2.0929	0.220904	0.300392	12.0767	1.73168	4.62949	0.386179
	13	Auditory	11.9236	2.6572	11.9236	2.6572	2.96429e-09	0.193837	12.4464	1.9223	0.194753	0.792368	12.9019	1.60755	5.18119	0.655412
		Multisensory	11.9994	1.7259	11.9994	1.7259	2.96822e-09	0.193837	12.1652	1.34946	0.0494287	0.885332	12.5306	1.14281	8.10245	0.625704
		Visual	12.739	2.26988	12.739	2.26988	2.96693e-09	0.193837	12.7231	1.89483	0.106155	0.47586	12.7049	1.62495	6.14762	0.493245
	14	Auditory	12.8928	2.43649	12.9813	2.42045	9.64868e-09	0.0184286	13.0453	2.16221	0.0804768	0.667783	13.56	1.95293	7.74786	0.601711
		Multisensory	12.3129	1.80989	12.3799	1.79787	9.66021e-09	0.0184286	12.3478	1.49733	0.017178	0.81031	12.575	1.31963	9.55526	0.565727
		Visual	13.4531	2.7034	13.5419	2.68526	9.65223e-09	0.0184286	12.7228	2.07553	0.200838	0.100893	11.8687	1.79016	6.06559	0.265713
	15	Auditory	11.7563	3.15339	11.6683	3.11981	1.85073e-08	-0.0175228	11.8758	2.39518	0.184646	0.590997	11.9933	1.95601	4.82264	0.539785
		Multisensory	11.6551	2.22096	11.5849	2.20351	1.85083e-08	-0.0175228	11.7925	1.73432	0.0752252	0.729535	12.0543	1.44436	6.697	0.578416
		Visual	12.3025	3.12857	12.2119	3.11266	1.85057e-08	-0.0175228	11.997	2.51457	0.151893	0.320775	11.5422	2.14191	5.68282	0.401939
	16	Auditory	12.5036	3.51063	12.3153	3.39898	0.0206821	-0.0345981	12.7723	2.54031	0.219612	0.60594	14.3586	2.77123	8.38282	0.706386
		Multisensory	12.276	1.83622	12.1443	1.76533	0.0206821	-0.0345981	12.1608	1.47661	0.0293309	0.0759544	10.8671	1.4258	19.9716	0.188903
		Visual	13.011	2.15441	12.8471	2.06579	0.0206821	-0.0345981	12.6122	1.81466	0.110799	0.0792034	11.4841	1.66276	9.53795	0.240407
	17	Auditory	12.7794	3.45239	12.7584	3.38575	0.0139451	-0.0040716	12.9736	2.54833	0.214944	0.567807	13.2053	2.16984	4.74518	0.550261
		Multisensory	12.0376	2.09275	12.0173	2.04404	0.0139451	-0.0040716	11.9982	1.59418	0.0431645	0.438009	11.9708	1.34326	7.52862	0.489725
		Visual	12.7606	2.6313	12.7403	2.56403	0.0139451	-0.0040716	12.4563	2.0434	0.168289	0.308061	12.1522	1.71041	5.24469	0.405873
Neutral			Ideal observer		Fixed error				Inattention				Exploration
(theoretical)			Mu	Sigma	Mu	Sigma	pError	errorBias	Mu	Sigma	pInattention	guessBias	Mu	Sigma	Beta	rewardBias
	1	Auditory	13.3714	2.86002	13.3745	2.70317	0.034485	-0.00081252	13.3406	2.84395	0.0106276	0.133685	12.7629	1.9725	5.80943	0.407888
		Multisensory	12.2606	1.77405	12.2501	1.64969	0.034485	-0.00081252	12.2329	1.31846	0.0400249	0.530147	12.2577	1.10547	7.93323	0.510113
		Neutral	12.3686	2.86002	12.3659	2.70317	0.034485	-0.00081252	12.5677	2.84395	0.0400249	0.999996	13.4213	1.9725	5.80943	0.64814
		Visual	12.995	2.26175	12.9957	2.08245	0.034485	-0.00081252	12.6739	1.48802	0.206525	0.308085	12.4537	1.33479	4.95146	0.398877
	2	Auditory	13.1505	3.79916	14.2015	3.31893	0.0520303	0.180875	13.3895	2.94822	0.246339	0.546149	12.9658	1.40616	2.76314	0.455468
		Multisensory	12.3487	2.93027	13.0696	2.55928	0.0520303	0.180875	12.575	1.59124	0.153683	0.695789	12.8171	1.36025	5.69208	0.592676
		Neutral	12.5676	3.79916	13.5788	3.31893	0.0520303	0.180875	13.4566	2.94822	0.153683	1	13.1423	1.40616	2.76314	0.580432
		Visual	13.3999	4.60389	14.5816	4.01962	0.0520303	0.180875	12.8233	1.89019	0.539782	0.405787	12.979	5.36679	47.9093	0.459431
	3	Auditory	12.1323	2.17858	12.3034	2.01046	0.0443443	0.03926	12.2287	2.09776	0.0325316	0.864599	12.6327	1.71596	7.70613	0.589669
		Multisensory	12.014	1.80484	12.135	1.67553	0.0443443	0.03926	12.1629	1.38322	0.0567804	0.836244	12.4256	1.21444	8.19173	0.595559
		Neutral	12.1198	2.17858	12.2942	2.01046	0.0443443	0.03926	12.3497	2.09776	0.0567804	1	13.289	1.71596	7.70613	0.699556
		Visual	12.717	3.22258	12.924	3.03175	0.0443443	0.03926	12.4103	1.83984	0.316373	0.414577	12.2212	1.719	3.99192	0.431023
	4	Auditory	12.428	3.50293	12.8934	3.03009	0.110226	0.0858762	12.2296	2.15665	0.292331	0.445923	7.75834	2.87632	29.7559	0.0759627
		Multisensory	10.9747	2.75322	11.3461	2.38112	0.110226	0.0858762	11.9211	1.53376	0.307591	0.851411	14.5595	1.99789	17.8418	0.923149
		Neutral	10.7888	3.50293	11.2252	3.03009	0.110226	0.0858762	12.0973	2.15665	0.307591	0.921877	15.1478	2.87632	29.7559	0.913287
		Visual	12.7472	4.45319	13.2799	3.85012	0.110226	0.0858762	11.8056	2.1817	0.362806	0.30706	6.94521	2.77711	30.0408	0.0449167
	5	Auditory	12.6563	2.2824	12.9365	1.89152	0.083734	0.0672946	12.8494	1.92535	0.0403467	0.999998	15.8419	1.71394	2.55433	19.2003
		Multisensory	12.1845	1.94698	12.475	1.63131	0.083734	0.0672946	12.4551	1.42217	0.126095	0.756088	13.3278	1.55056	2.72987	2.52847
		Neutral	12.3582	2.2824	12.6851	1.89152	0.083734	0.0672946	12.9078	1.92535	0.126095	0.999996	13.1926	1.71394	2.55433	1.75591
		Visual	12.8318	3.73099	13.2073	3.22287	0.083734	0.0672946	12.6023	2.10978	0.304987	0.429184	16.5984	3.63901	90.7011	5.66055
Increased reward		Conditions		Ideal observer		Fixed lapse				Inattention				Exploration - Increased reward
(theoretical)				Mu	Sigma	Mu	Sigma	pError	errorBias	Mu	Sigma	pInattention	guessBias	Mu	Sigma	Beta*rL	Beta*rR
	1	Equal reward	Auditory	13.5604	2.69925	13.6045	2.50874	0.0353766	0.579179	14.1209	3.97125	8.40655e-05	0.00447472	12.9496	1.55128	2.6654	0.491081
		Inc. reward	Auditory	13.0666	2.69925	13.0984	2.50874	0.0353766	0.579179	13.3097	3.97125	8.3892e-05	0.0061921	12.9496	1.55128	2.6654	1.1858
	2	Equal reward	Auditory	13.0414	2.28069	13.3762	1.94668	0.0596974	0.999994	13.427	2.00315	0.0739998	0.999994	14.327	1.81311	2.65134	2.31601
		Inc. reward	Auditory	12.7755	2.28069	13.0556	1.94668	0.0596974	0.999994	13.1091	2.00315	0.0739998	0.999996	14.327	1.81311	2.65134	3.14906
	3	Equal reward	Auditory	12.0937	2.92888	12.6284	2.46854	0.120114	0.934809	12.519	2.47093	0.1448	0.825562	16.7515	2.38246	1.8852	21.4237
		Inc. reward	Auditory	10.5485	2.92888	11.0354	2.46854	0.120114	0.934809	11.1309	2.47093	0.1448	0.921567	16.7515	2.38246	1.8852	99.9996
Decreased reward				Ideal observer		Fixed lapse				Inattention				Exploration - decreased reward
(theoretical)				Mu	Sigma	Mu	Sigma	pError	errorBias	Mu	Sigma	pInattention	guessBias	Mu	Sigma	Beta*rL	Beta*rR
	1	Equal reward	Auditory	12.3174	4.58292	10.9352	3.79515	0.181332	0.0781771	9.80479	2.83119	0.384549	9.60217e-05	11.2842	1.90584	2.60871	0.825784
		Dec. reward	Auditory	14.2361	4.58292	13.2371	3.79515	0.181332	0.0781771	11.5295	2.83119	0.384549	3.57347e-05	11.2842	1.90584	2.60871	0.402753
	2	Equal reward	Auditory	9.69633	3.63075	9.57559	3.29261	0.058609	0.654558	11.482	1.72014	0.378573	0.877594	13.6984	2.14681	1.56633	12.3342
		Dec. reward	Auditory	12.2912	3.63075	12.417	3.29261	0.058609	0.654558	12.921	1.72014	0.378573	0.643913	13.6984	2.14681	1.56633	3.29213
	3	Equal reward	Auditory	12.3917	2.81847	12.5454	2.62134	0.03299	0.98626	12.584	2.09763	0.177384	0.602544	14.2969	2.47274	3.46731	10.5058
		Dec. reward	Auditory	13.7091	2.81847	13.8734	2.62134	0.03299	0.98626	13.6373	2.09763	0.177384	0.402657	14.2969	2.47274	3.46731	4.64688
Probabilistic reward				Ideal observer		Fixed lapse				Inattention				Exploration - probabilistic reward
(theoretical)				Mu	Sigma	Mu	Sigma	pError	errorBias	Mu	Sigma	pInattention	guessBias	Mu	Sigma	Beta*rL	Beta*rR
	1	p(rLoR) = 0	Visual	11.8258	2.40248	11.8159	1.98198	0.094614	0.511734	11.8945	1.83035	0.13266	0.597224	11.9261	1.68146	3.60943	3.82
		p(rLoR) = 0.5	Visual	12.9628	2.40248	12.9789	1.98198	0.094614	0.511734	12.8392	1.83035	0.13266	0.391806	11.9261	1.68146	3.60943	1.86444
	2	p(rLoR) = 0	Visual	12.0277	1.7167	11.5631	1.38978	0.0746261	0.0746232	11.6801	1.43776	0.0569601	0.0588247	14.252	1.8108	32.2788	5.11199
		p(rLoR) = 0.5	Visual	13.2046	1.7167	13.0506	1.38978	0.0746261	0.0746237	13.1148	1.44877	0.054502	0.0116928	14.252	1.8108	32.2788	2.86341
	3	p(rLoR) = 0	Visual	12.1571	1.8812	11.9747	1.55039	0.0657122	0.214777	12.0047	1.53427	0.0706	0.294838	11.0224	1.55591	11.384	3.89082
		p(rLoR) = 0.5	Visual	12.8959	1.8812	12.7233	1.55039	0.0657122	0.214777	12.6862	1.53427	0.0706	0.16979	11.0224	1.55591	11.384	2.38732
	4	p(rLoR) = 0	Visual	12.5297	3.09212	11.8804	2.42887	0.140756	0.0514711	12.5297	3.09212	2.3225e-08	0.661807	9.51703	2.23133	13.8018	2.10423
		p(rLoR) = 0.5	Visual	13.0946	3.09212	12.436	2.42887	0.140756	0.0514711	13.0946	3.09212	2.3225e-08	0.593737	9.51703	2.23133	13.8018	1.57911
	5	p(rLoR) = 0	Visual	13.655	2.91856	12.8659	1.95872	0.251066	0.149536	13.655	2.91855	3.8956e-08	0.766424	12.4523	1.4935	3.21918	1.38725
		p(rLoR) = 0.5	Visual	14.0181	2.91856	13.1963	1.95872	0.251066	0.149536	14.0181	2.91855	3.8956e-08	0.729006	12.4523	1.4935	3.21918	1.08316
Inactivation
AREA	INDIVIDUALS	INAC SIDE	MODALITY	MODELS
				Exploration - biased evidence						Exploration - biased value						Exploration - biased effort
				Sigma	Mu	Beta*rL	Beta*rR	kSaline	kMuscimol	Sigma	Mu	Beta*rL	Beta*rR	kSaline	kMuscimol	Sigma	Mu	Beta*rL	Beta*rR	kSaline	kMuscimol
M2		High rate
	9		Auditory	12.3625	2.55874	4.48891	2.75919	0	-0.850541	12.4262	2.36407	4.7995	2.986	1	0.300756	13.4354	2.43536	3.50401	3.53302	0	1.90935
			Multisensory	14.8967	1.68402	3.07279	42.9205	5.11695e-11	-0.850541	14.8757	1.52866	3.92592	94.682	1	0.300756	14.7056	1.58904	3.24806	56.4762	5.11695e-11	1.90935
			Visual	10.2086	2.23673	13.9333	2.73489	-8.81171e-10	-0.850541	12.2721	2.00391	4.57678	3.48006	1	0.300756	14.0648	2.0969	2.97893	6.78891	-8.81171e-10	1.90935
	10		Auditory	9.05322	2.35551	40.9297	1.68805	-7.42387e-16	-1.61675	13.0472	1.55896	3.78082	2.11047	1	4.27985e-09	17.967	2.31599	2.69259	45.7484	-7.42387e-16	2.55205
			Multisensory	11.4581	1.63544	5.17071	2.62099	4.62056e-16	-1.61675	12.6161	1.17358	2.49679	3.72968	1	5.29761e-09	15.4603	1.72112	2.91944	71.3926	4.62056e-16	2.55205
			Visual	10.5842	2.27245	7.28128	1.76778	1.20525e-15	-1.61675	12.7543	1.78285	2.74246	2.34091	1	5.08338e-09	17.8972	2.57219	2.60728	48.9417	1.20525e-15	2.55205
	11		Auditory	13.6134	2.20313	2.18842	2.76606	-3.30297e-22	-0.296558	13.349	1.94304	2.23531	2.43862	1	0.671802	13.7991	2.1475	2.08198	3.00717	-3.30297e-22	0.329239
			Multisensory	11.7413	1.45862	2.23278	4.14241	-2.53256e-22	-0.296558	11.7726	1.28833	2.04461	4.01106	1	0.671802	11.654	1.45878	2.24714	4.1378	-2.53256e-22	0.329239
			Visual	11.1436	1.94626	4.48335	1.8797	-2.62016e-22	-0.296558	11.6854	1.72105	3.41286	1.90174	1	0.671802	11.8393	1.9878	3.19198	2.11471	-2.62016e-22	0.329239
		Low rate
	7		Auditory	14.0683	3.69703	2.37598	2.73421	-2.0898e-21	0.493204	10.5762	3.06272	3.92661	1.12226	1	0.440928	9.51012	5.40198	30.1825	8.23061	-2.0898e-21	-2.15725
			Multisensory	11.5605	2.00761	5.50181	3.60249	-9.39893e-22	0.493204	11.5534	1.6405	4.97841	3.31177	1	0.440928	8.54085	2.30069	53.6022	4.0459	-9.39893e-22	-2.15725
			Visual	12.9643	2.39084	3.9736	3.2228	-5.68266e-22	0.493204	13.0009	1.94268	3.35669	2.83057	1	0.440928	9.97452	2.54285	31.7602	4.12722	-5.68266e-22	-2.15725
	8		Auditory	13.3792	1.64002	2.19691	2.90704	-1.13113e-17	1.19904	13.3997	2.13412	3.35218	4.73839	1	0.205249	16.0723	3.4	10.1447	41.6999	-1.13113e-17	-7.73549
			Multisensory	11.849	1.42007	3.30339	1.84381	-3.62636e-18	1.19904	14.9998	1.74489	2.73475	22.4278	1	0.205249	13.7963	2.06155	9.03433	21.4476	-3.62636e-18	-7.73549
			Visual	10.0581	2.83877	26.0166	3.13653	5.51438e-18	1.19904	14.9995	3.03056	55.4702	96.0336	1	0.205249	11.8716	2.59247	23.0782	8.33455	5.51438e-18	-7.73549
	9		Auditory	12.3179	2.21644	2.88039	1.77766	-4.7212e-14	0.202153	12.2597	2.12987	2.98198	1.79928	1	0.781687	8.388	2.74534	23.3999	1.82253	-4.7212e-14	-0.534208
			Multisensory	11.6206	1.3978	3.71931	3.92858	9.4835e-15	0.202153	11.7538	1.34198	3.5468	4.25663	1	0.781687	9.26967	1.68258	47.0145	4.54666	9.4835e-15	-0.534208
			Visual	10.8423	1.80113	3.45519	2.33087	3.51464e-14	0.202153	11.2191	1.72816	3.03759	2.60422	1	0.781687	8.3975	2.1294	24.1423	2.67317	3.51464e-14	-0.534208
	10		Auditory	13.6084	2.29346	2.42687	2.05662	-7.23635e-13	0.475739	12.8974	2.37621	3.02184	1.85603	1	0.476389	12.5575	3.94756	18.3634	9.62744	-7.23635e-13	-1.44623
			Multisensory	8.78144	1.64421	99.61	3.3029	9.76773e-14	0.475739	10.0029	1.62395	51.8607	6.37076	1	0.476389	15.2739	1.79531	2.04412	32.7959	9.76773e-14	-1.44623
			Visual	7.55785	2.35841	78.2219	1.32226	2.56361e-13	0.475739	10.1661	2.22452	13.2456	1.77166	1	0.476389	11.4509	2.01566	5.86908	2.19532	2.56361e-13	-1.44623
	11		Auditory	13.0958	2.19596	1.75543	2.73073	1.19193e-21	0.195935	13.0589	1.97829	1.64456	2.6507	1	0.741768	12.9124	2.19649	1.78274	2.61166	1.19193e-21	-0.293083
			Multisensory	11.7997	1.33662	2.51713	3.92643	1.52897e-21	0.195935	11.9751	1.18519	2.18189	4.23364	1	0.741768	11.9125	1.29482	2.27976	3.89425	1.52897e-21	-0.293083
			Visual	11.6256	1.68463	2.64284	2.52745	1.19626e-21	0.195935	11.8519	1.48024	2.28369	2.6677	1	0.741768	11.5939	1.60295	2.60263	2.47221	1.19626e-21	-0.293083
pStr		High rate
	3		Auditory	7.80551	2.98681	33.6601	1.68904	-8.4207e-24	-0.688932	12.3058	1.85433	3.00772	1.54192	1	0.287535	16.2425	3.50378	3.69084	12.4371	-8.4207e-24	1.41064
			Multisensory	12.8368	1.89464	2.61104	4.13217	-4.70522e-24	-0.688932	12.971	1.18294	1.91251	3.51927	1	0.287535	16.5266	1.97772	2.02794	70.9872	-4.70522e-24	1.41064
			Visual	6.88513	2.45083	52.9718	1.98556	1.19547e-24	-0.688932	11.4736	1.5361	2.59513	1.96745	1	0.287535	13.008	2.39572	2.51927	4.08501	1.19547e-24	1.41064
	5		Auditory	12.3988	1.66828	1.74865	1.57801	-5.29771e-18	-0.358888	12.3853	1.61164	1.93959	1.6147	1	0.565044	18.5731	3.62233	4.63605	77.3707	-5.29771e-18	1.28593
			Multisensory	12.0441	1.61362	0.932872	3.1606	-5.51618e-18	-0.358888	11.8776	1.53392	1.06217	3.1591	1	0.565044	7.92388	3.06447	41.2125	11.5944	-5.51618e-18	1.28593
			Visual	11.5226	6.35562	99.9821	92.4528	-6.81223e-18	-0.358888	11.3703	5	4.44205	3.97698	1	0.565044	19.9967	5.7474	3.02841	30.5916	-6.81223e-18	1.28593
	6		Auditory	11.4254	1.75209	2.08305	1.62721	-7.45904e-14	-0.435303	10.0092	2.08214	5.04915	1.68334	1	0.554707	8.21919	3.96985	99.7969	22.8172	-7.45904e-14	3.44719
			Multisensory	12.2613	1.65449	1.10941	3.31148	-3.76623e-14	-0.435303	12.0091	1.87426	1.70831	3.70366	1	0.554707	12.7804	3.04124	7.64647	18.4505	-3.76623e-14	3.44719
			Visual	13.1829	5.02742	99.8458	69.9942	2.83943e-14	-0.435303	14.9659	4.30315	4.85341	6.51318	1	0.554707	15.227	4.73152	8.9448	12.1085	2.83943e-14	3.44719
	1		Auditory	10.8575	2.25683	47.9436	2.46457	-2.01528e-15	-1.14388	11.8332	1.93292	23.8811	2.41122	1	0.150513	14.5313	1.95867	6.29276	5.48132	-2.01528e-15	3.85481
			Multisensory	13.229	1.75047	76.4553	65.9116	-1.7676e-14	-1.14388	13.3721	1.49296	10.8296	9.64809	1	0.150513	13.6971	1.66733	5.3954	6.52639	-1.7676e-14	3.85481
			Visual	8.07908	2.77331	61.1966	1.67073	-1.40872e-14	-1.14388	10.3785	2.35054	14.8231	1.6554	1	0.150513	18.872	3.17738	5.10158	63.1032	-1.40872e-14	3.85481
	2		Auditory	10.9933	3.0805	4.95082	3.11322	9.01694e-15	-0.434574	10	3.04061	7.94434	3.06849	1	0.529877	9.78673	3.69175	98.3062	44.833	9.01694e-15	3.78492
			Multisensory	11.4012	2.24366	22.2884	16.776	-1.20706e-15	-0.434574	11.8451	2.11038	6.81333	7.17007	1	0.529877	10.1397	2.4376	15.4497	5.23886	-1.20706e-15	3.78492
			Visual	6.89223	3.27438	71.0219	2.7325	-7.21067e-15	-0.434574	15	2.93145	3.19827	7.57305	1	0.529877	17.0095	3.24573	6.27524	37.9615	-7.21067e-15	3.78492
	6		Auditory	13.3483	1.25639	0.771117	1.56056	9.68283e-22	-0.0352674	13.3508	1.21374	0.786255	1.53073	1	0.865051	13.3818	1.29641	0.771657	1.6145	9.68283e-22	-0.00330107
			Multisensory	12.3755	0.921865	1.49644	2.01232	9.84896e-22	-0.0352674	12.3861	0.888279	1.56935	2.01177	1	0.865051	12.435	0.958661	1.43395	2.06961	9.84896e-22	-0.00330107
			Visual	12.9113	1.35683	1.96496	0.308006	1.15022e-21	-0.0352674	12.8124	1.30351	2.10115	0.252307	1	0.865051	12.7759	1.42364	2.02017	0.275367	1.15022e-21	-0.00330108
		Low rate
	3		Auditory	13.0887	0.959202	1.42329	2.00256	-1.51455e-29	1.07149	13.519	1.1786	1.57954	2.97233	1	0.351534	17.6997	2.88428	4.17248	99.9983	-1.51455e-29	-3.08637
			Multisensory	12.1541	0.916462	2.27708	1.2398	-3.91209e-30	1.07149	12.3717	1.11129	2.48616	1.74207	1	0.351534	9.2732	2.22043	69.0923	5.08123	-3.91209e-30	-3.08637
			Visual	17.7219	3.10479	2.30475	43.5705	-4.00623e-30	1.07149	10.7127	3.33591	8.2698	4.09274	1	0.351534	6.07183	3.47898	68.6184	3.73801	-4.00623e-30	-3.08637
	6		Auditory	13.4733	1.45894	1.11812	2.61791	-9.10233e-11	0.486379	15	1.94985	1.21183	7.43754	1	0.513665	15.7729	3.81891	19.5351	98.7328	-9.10233e-11	-4.27313
			Multisensory	12.2034	1.38436	0.970285	2.99747	-5.98328e-11	0.486379	13.832	1.75024	1.08889	10.2779	1	0.513665	11.719	2.85261	21.7521	35.4225	-5.98328e-11	-4.27313
			Visual	15.2329	4.38611	49.6324	99.9764	-1.56158e-11	0.486379	11.8141	3.97106	8.94956	4.80572	1	0.513665	9.48513	4.28891	41.3758	8.88278	-1.56158e-11	-4.27313
	1		Auditory	14.0981	2.42254	3.83717	4.61601	-8.54822e-10	1.35557	14.6062	2.5499	4.43743	7.30954	1	0.077638	14.3463	1.98676	2.42383	3.53645	-8.54822e-10	-2.86396
			Multisensory	13.1985	1.5924	6.53975	7.68215	-4.2544e-10	1.35557	10.635	1.54908	99.9994	6.31218	1	0.077638	12.1857	1.28551	9.47998	3.33658	-4.2544e-10	-2.86396
			Visual	13.1378	2.11139	6.06465	4.04306	-2.05128e-12	1.35557	15	1.9502	5.10373	15.4877	1	0.077638	13.0672	1.68602	4.27314	2.68866	-2.05128e-12	-2.86396
	2		Auditory	12.9877	2.91908	1.65731	3.34351	-1.01487e-26	1.37613	11.5002	2.90899	2.74875	2.97156	1	0.118812	7.13129	3.27447	14.867	2.3664	-1.01487e-26	-2.05273
			Multisensory	14.5114	2.20893	2.00003	10.7595	-3.12143e-26	1.37613	15	2.31944	2.29535	18.1925	1	0.118812	12.1513	2.68916	2.83986	3.45705	-3.12143e-26	-2.05273
			Visual	12.7955	3.37892	2.16483	1.81654	-4.55791e-26	1.37613	10.8372	3.84306	4.74162	1.92086	1	0.118812	3.36616	4.71313	93.6177	2.36625	-4.55791e-26	-2.05273
	4		Auditory	16.0747	3.37034	1.29654	4.6271	-3.65279e-33	0.53344	12.9295	2.14069	1.29125	1.49737	1	0.354394	11.1885	3.40929	2.47395	1.53681	-3.65279e-33	-0.511289
			Multisensory	13.2937	2.09525	2.10657	3.90027	-4.44156e-33	0.53344	12.359	1.45078	2.03586	2.57758	1	0.354394	9.26562	2.30982	12.4378	1.94648	-4.44156e-33	-0.511289
			Visual	15.5942	2.67498	1.99324	2.90125	-6.04327e-33	0.53344	13.8914	1.97297	2.03554	1.20093	1	0.354394	13.6916	3.14041	2.72468	1.64757	-6.04327e-33	-0.511289
