# Supplementary material for: Lapses in perceptual decisions reflect exploration
Source: eLife journal article supplement (doi:10.7554/elife.55490), 2021-01-11

Figure 4 - Supplement 1

a. Effort-dependent disengagement & guessing

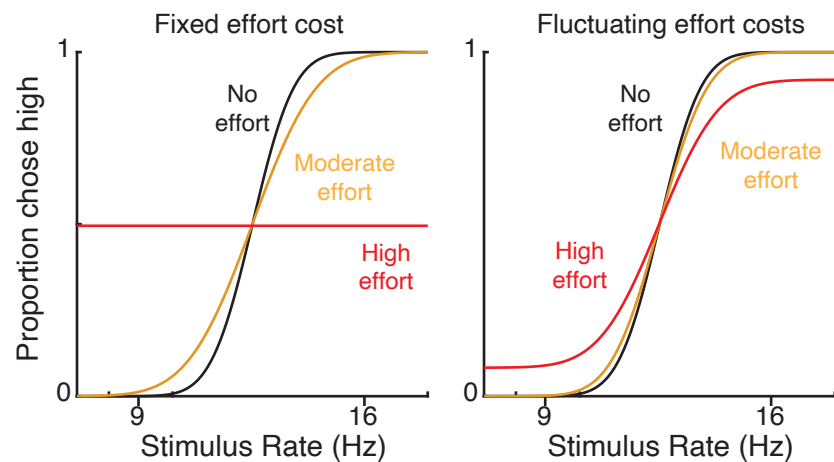

b.

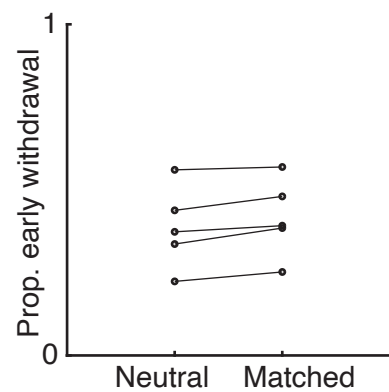

c.

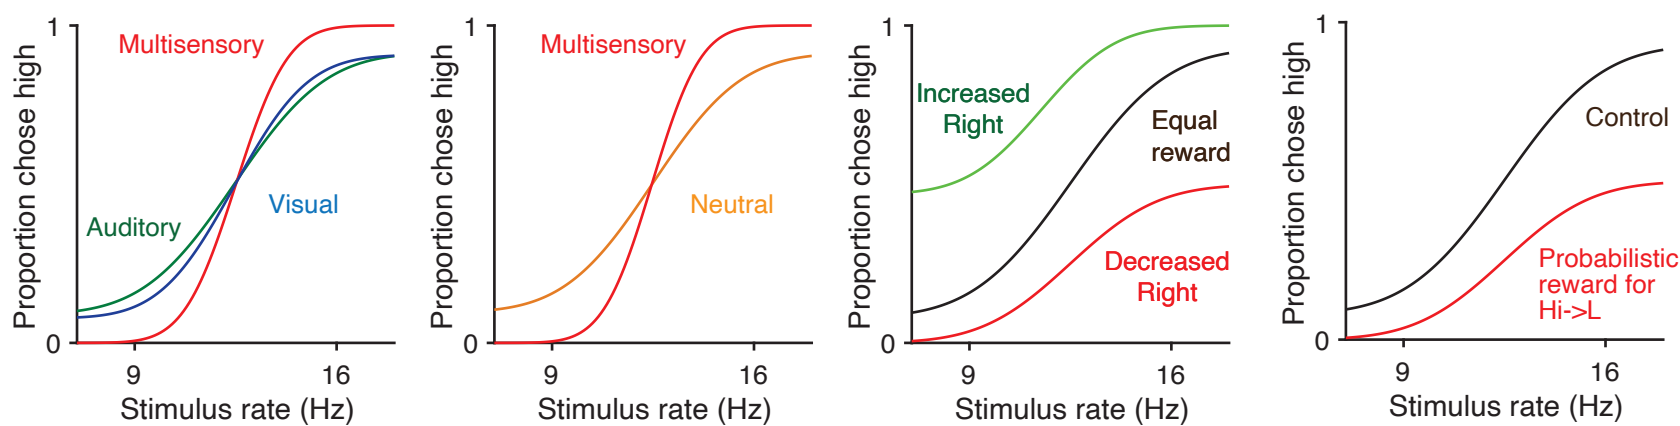

d. Temporal inattention

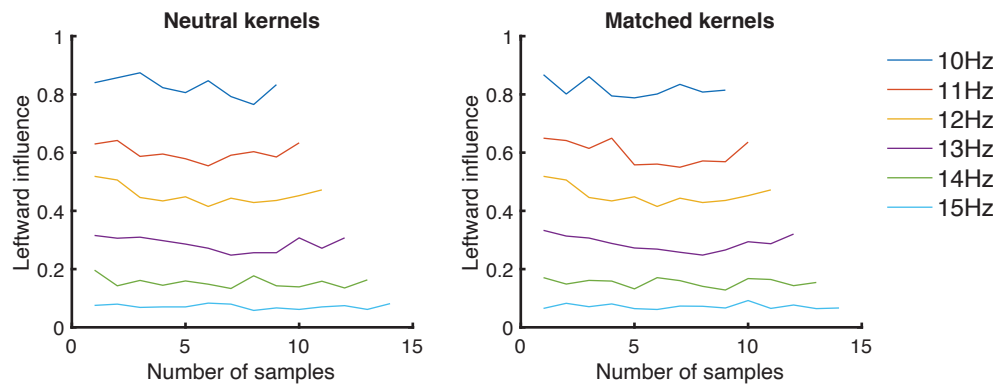

e. Variable precision

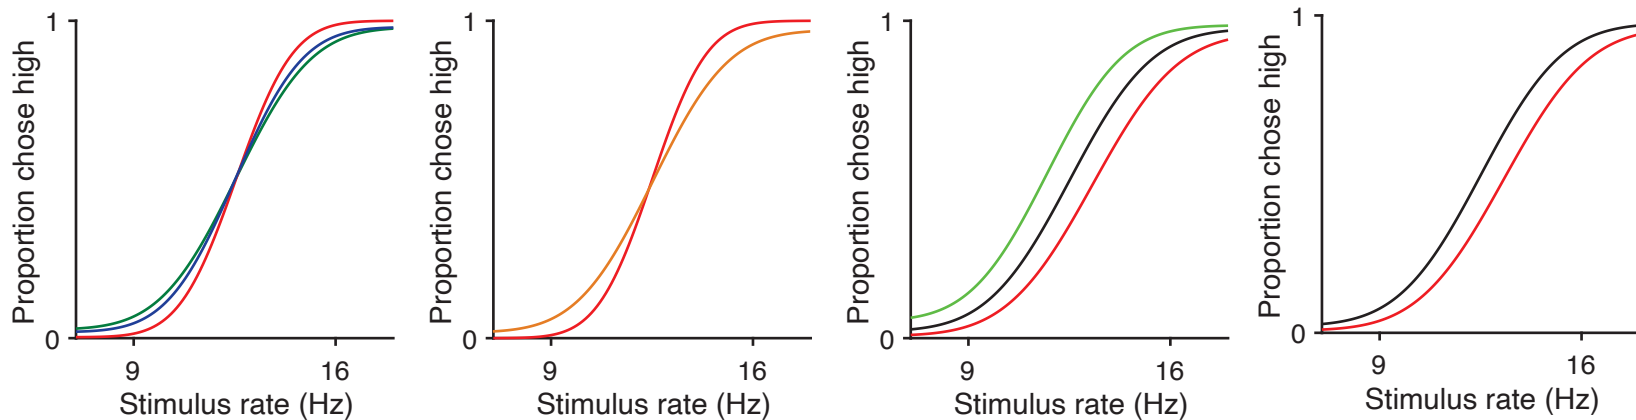

f. Motivation+Salience-dependent inattention

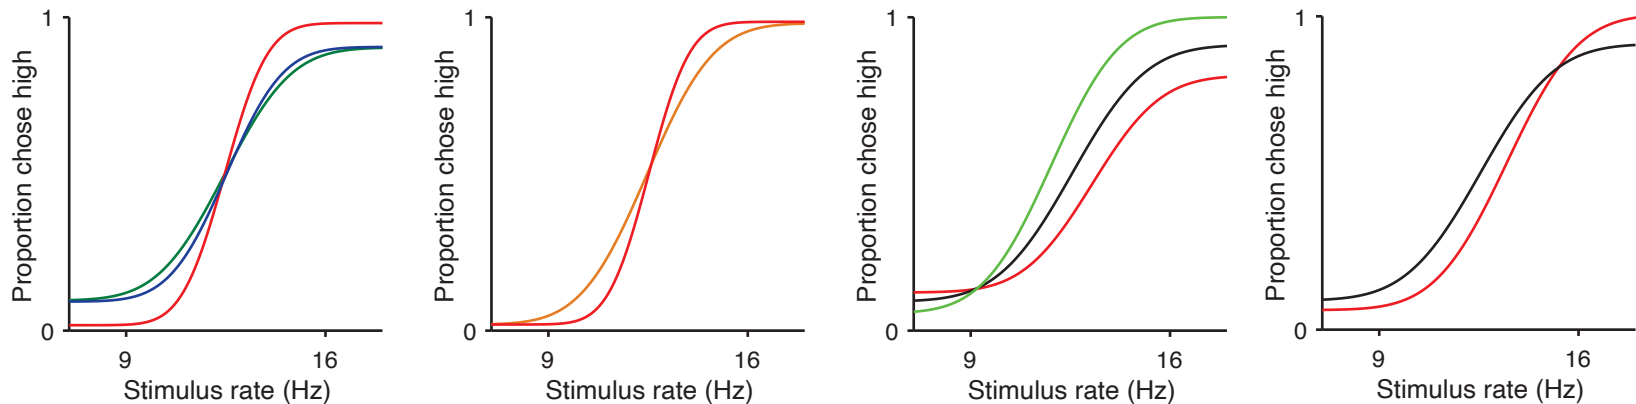

Supplement: supp [file elife-55490-supp-v1.zip]
