# Supplementary material for: Lapses in perceptual decisions reflect exploration
Source: eLife journal article supplement (doi:10.7554/elife.55490), 2021-01-11

## Figure 5 - Supplement 1

**a**

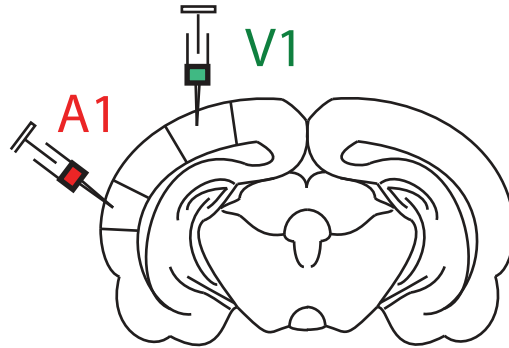

V1: AAV2.CB7.Cl.eGFP.WPRE.rBG

A1: AAV8.CAG.tdTomato.WPRE.SV40

**b** Secondary motor cortex (M2)

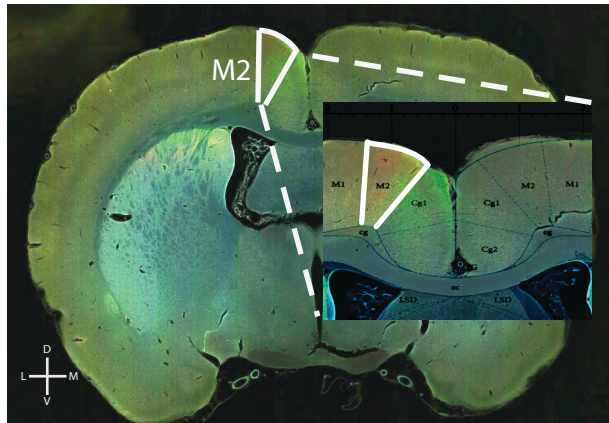

**c** Posterior striatum (pStr)

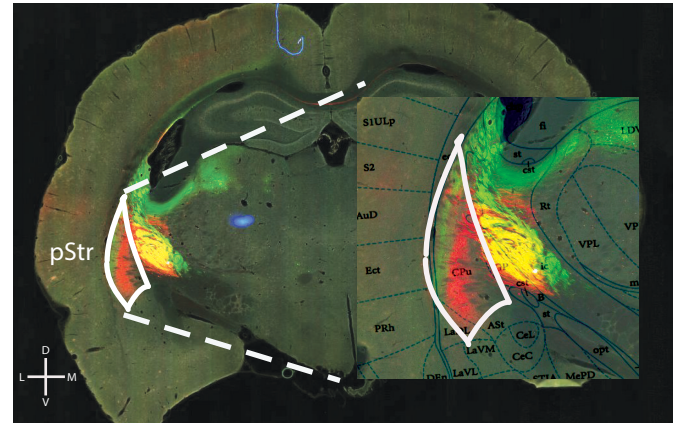

Supplement: supp [file elife-55490-supp-v1.zip]
