# Supplementary material for: Lapses in perceptual decisions reflect exploration
Source: eLife journal article supplement (doi:10.7554/elife.55490), 2021-01-11

Figure 3 - Supplement 2

a. Perceptual discrimination task

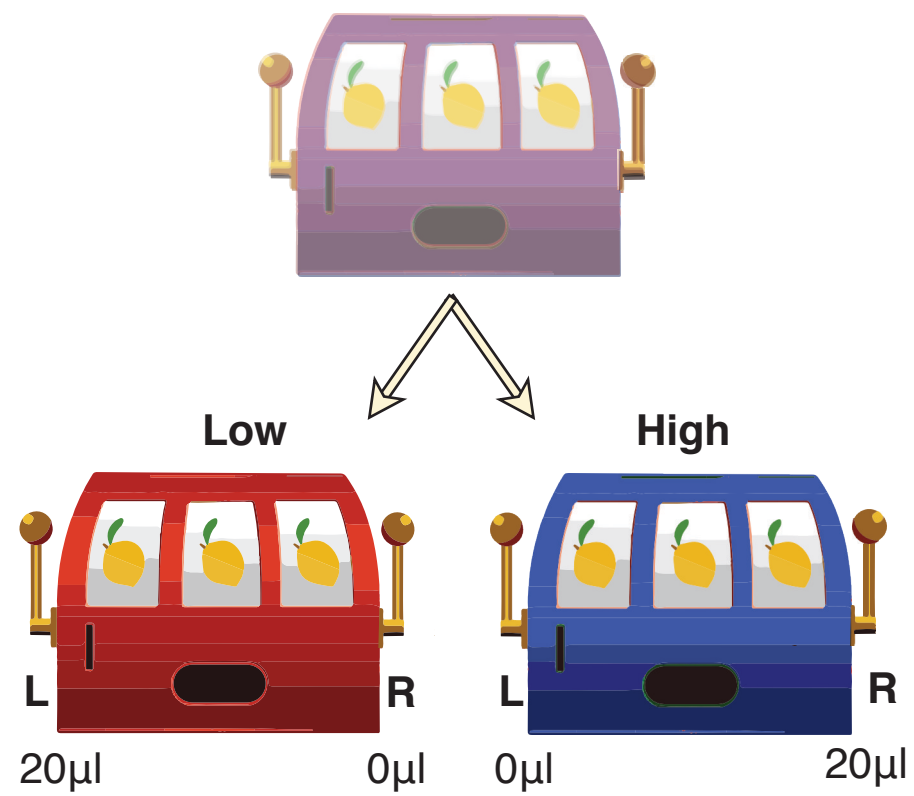

b. Exploration-exploitation tradeoff

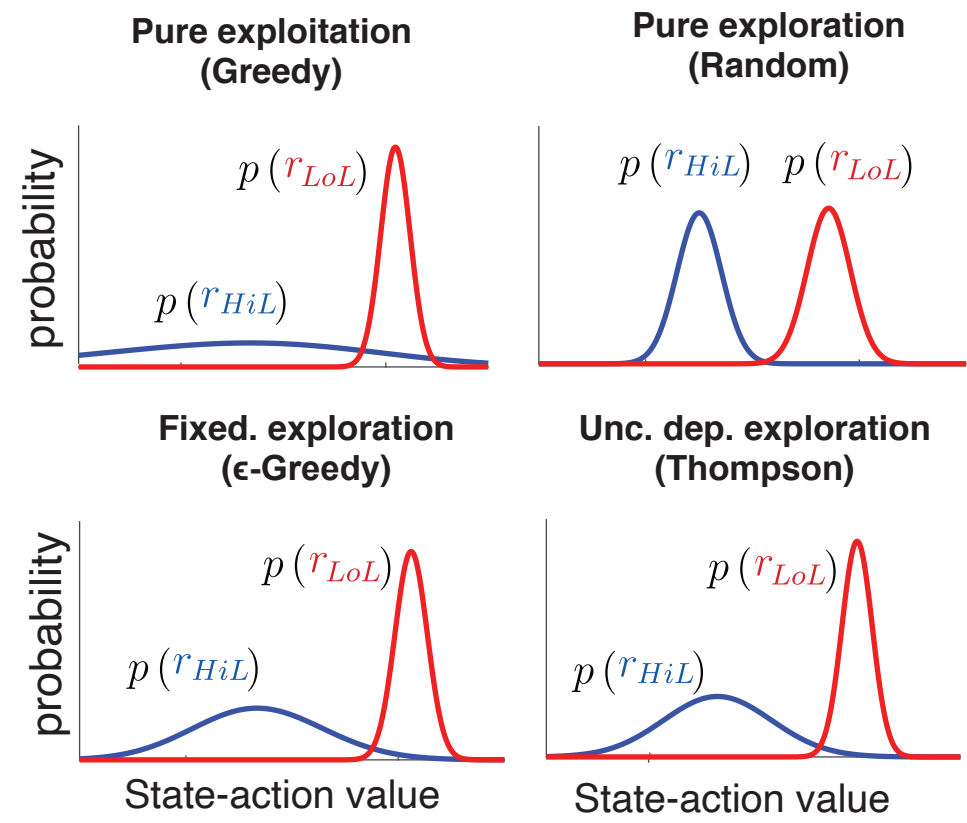

c. Cumulative regret

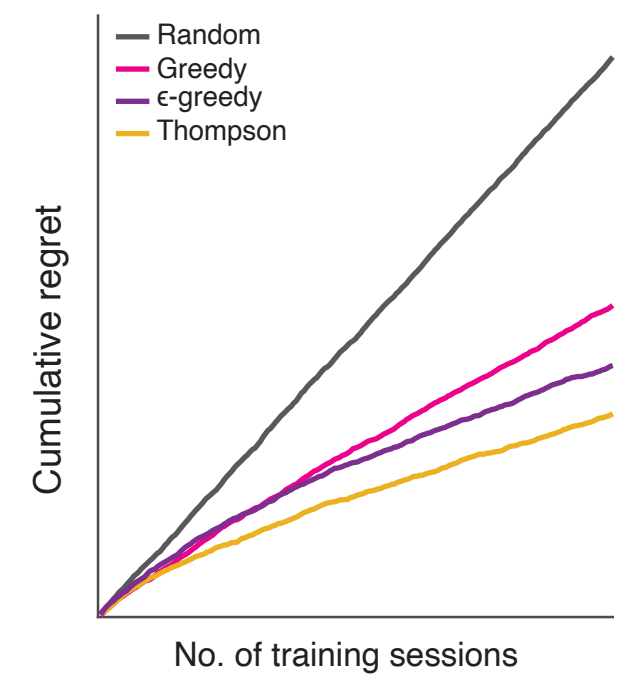

d. Effect of sensory noise

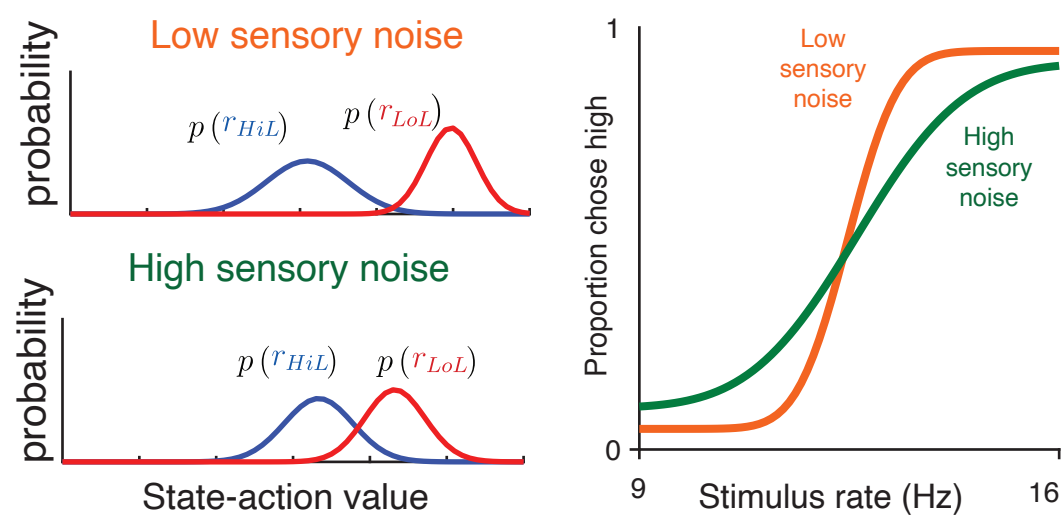

e. Session-averaged lapse rate

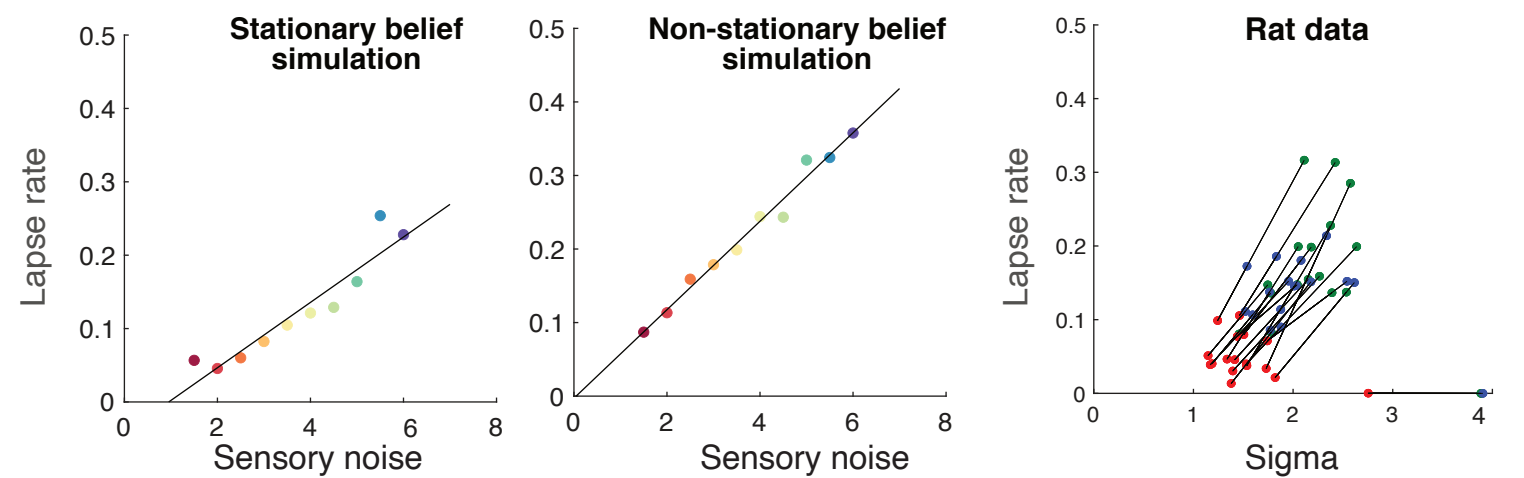

f. Effect of training

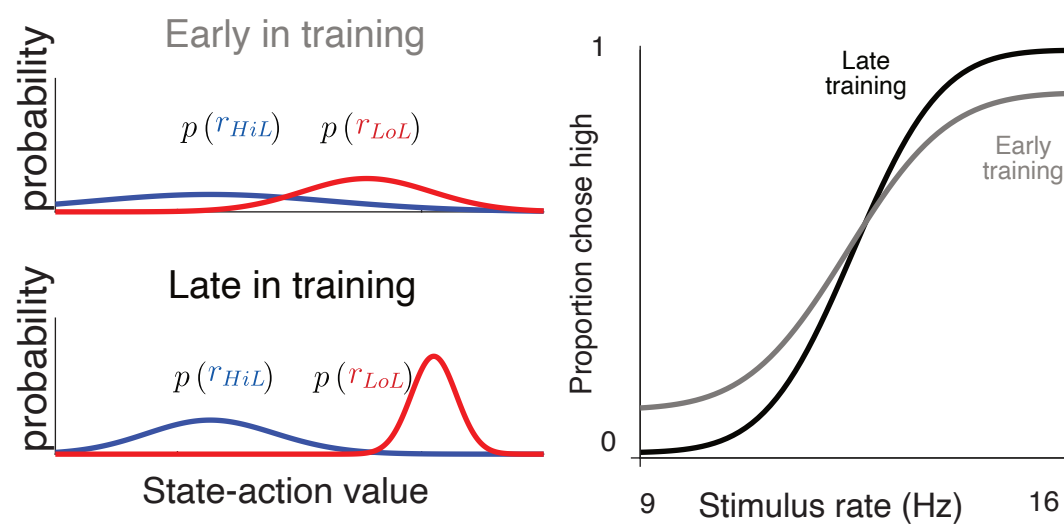

g. Session-by-session lapse rate

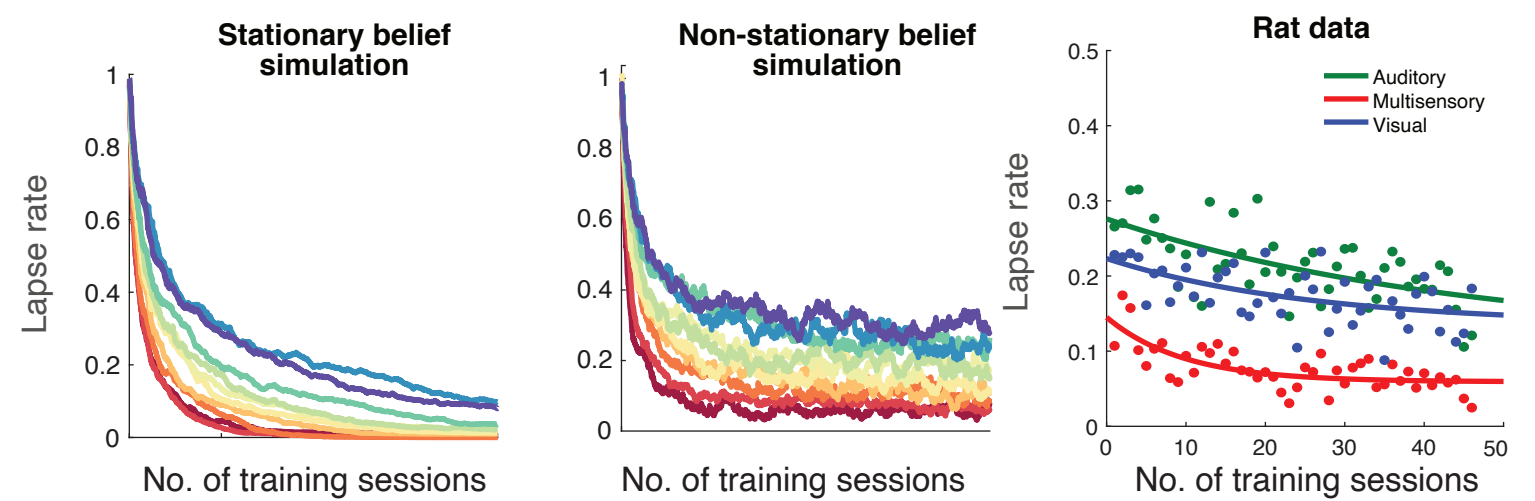

Supplement: supp [file elife-55490-supp-v1.zip]
