# Supplementary material for: Lapses in perceptual decisions reflect exploration
Source: eLife journal article supplement (doi:10.7554/elife.55490), 2021-01-11

Figure 3 - Supplement 1

Schematic model predictions

a. Ideal observer

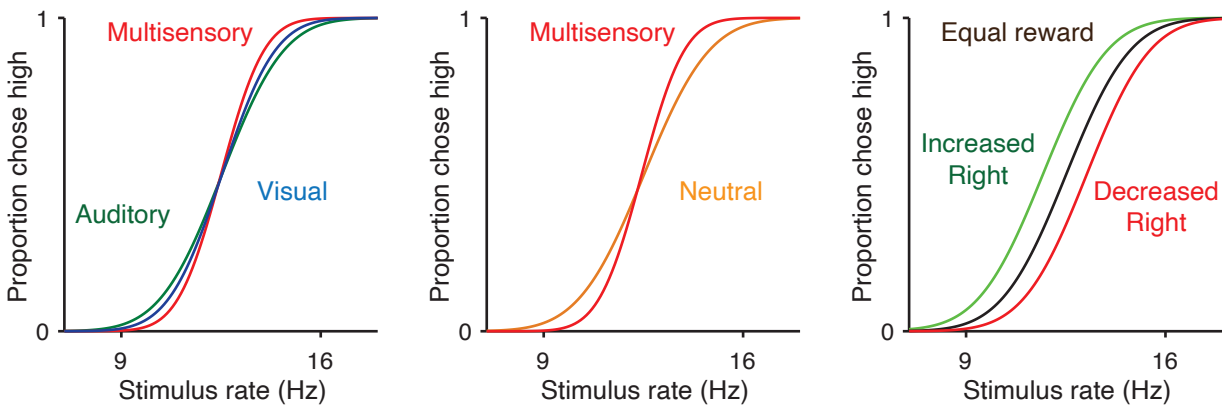

b. Motor error/  
 $\epsilon$ -Greedy

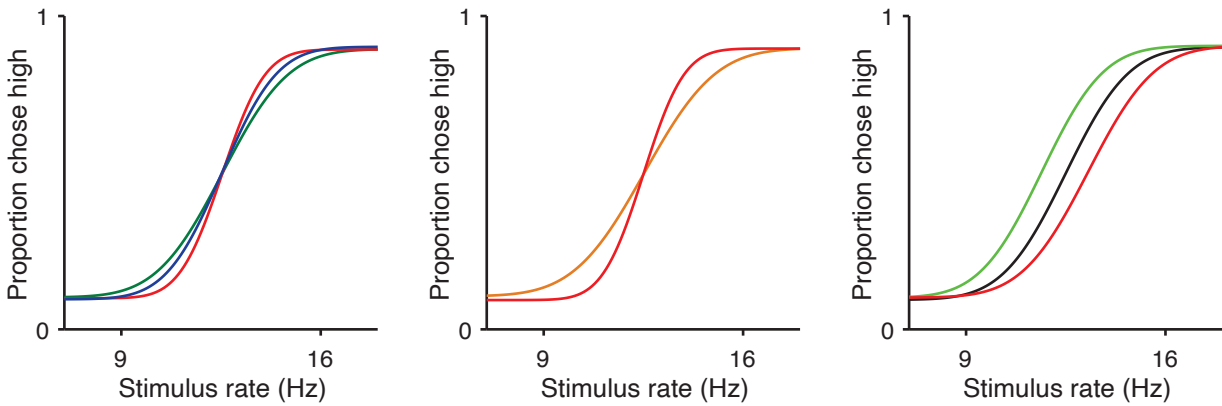

c. Salience  
dependent  
inattention

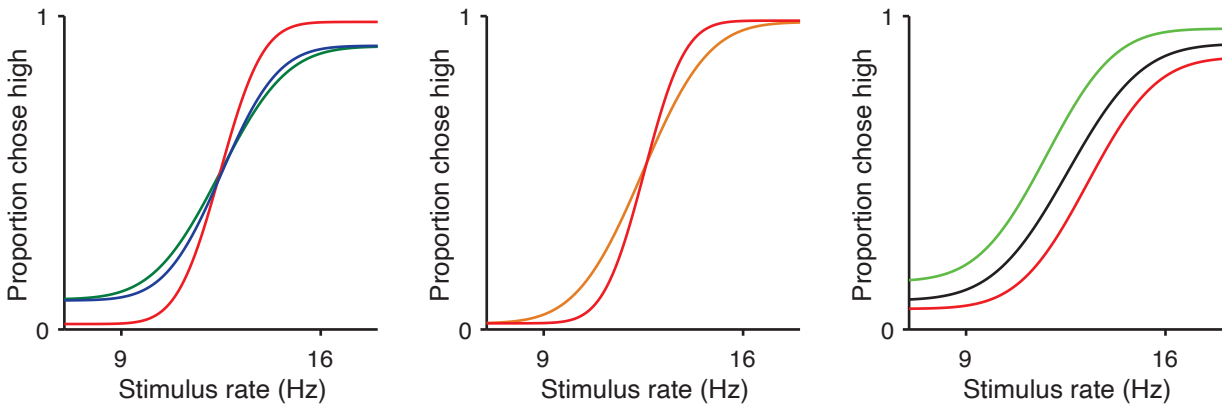

d. Uncertainty  
dependent  
exploration

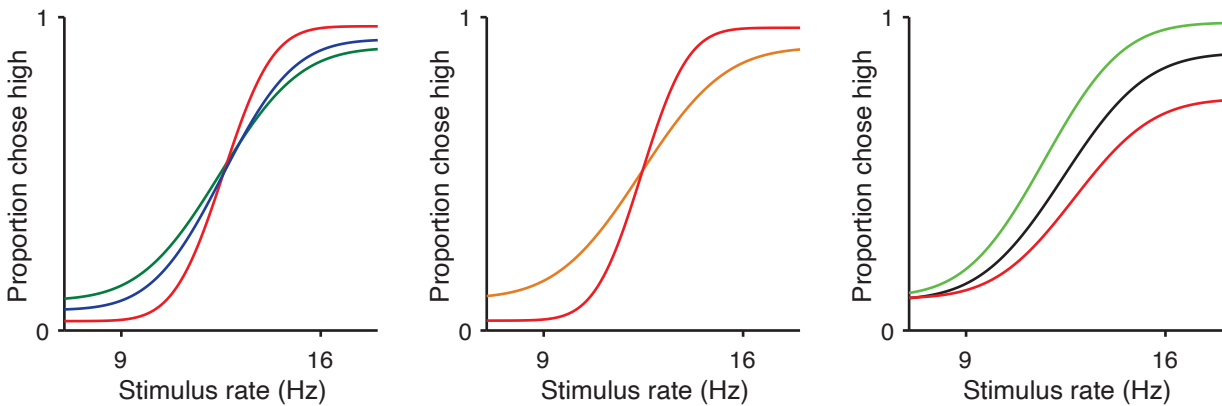

e. Example rat

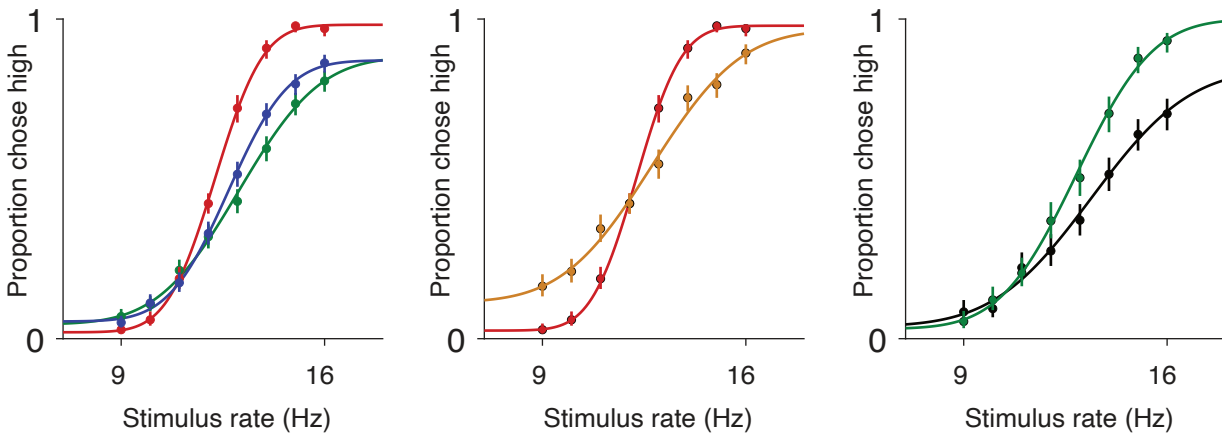

Supplement: supp [file elife-55490-supp-v1.zip]
