# Supplementary figures and images for: Lapses in perceptual decisions reflect exploration
Source: eLife journal article supplement (doi:10.7554/elife.55490), 2021-01-11

Figure 3 - Supplement 3

a. Fits to average, individual rat data

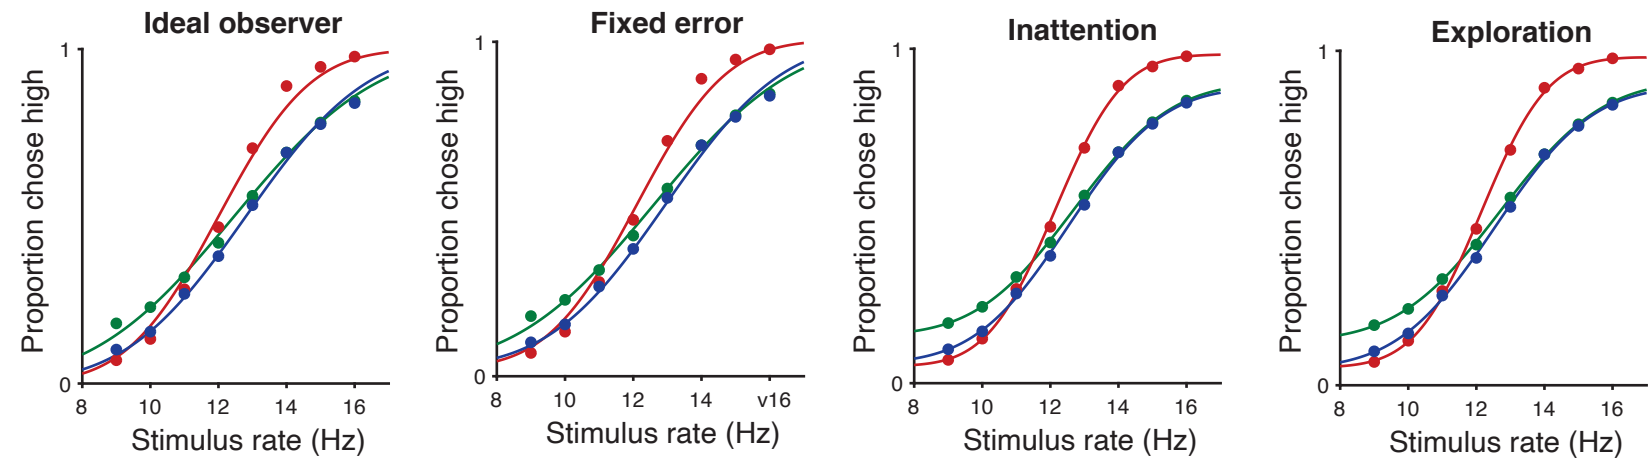

c.

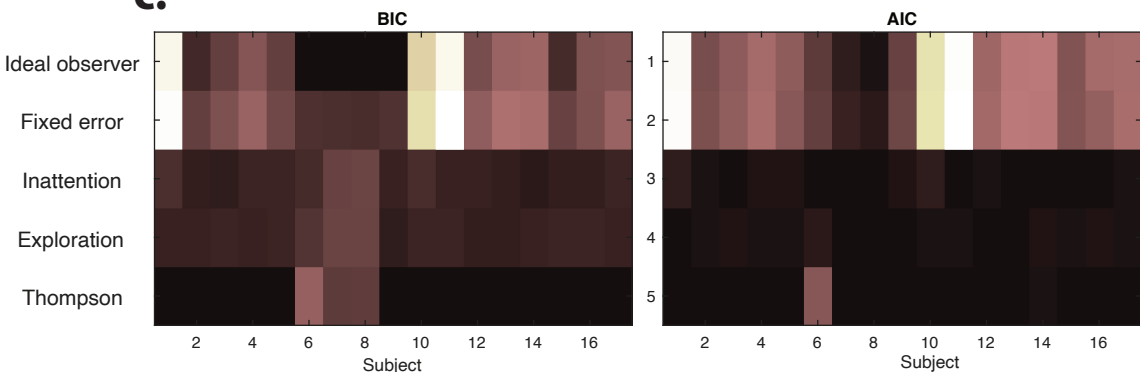

d.

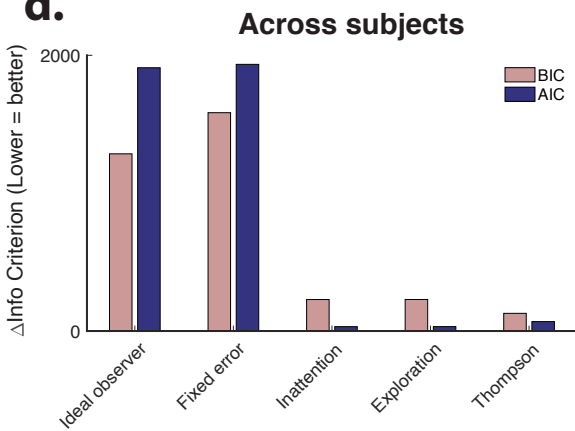

b.

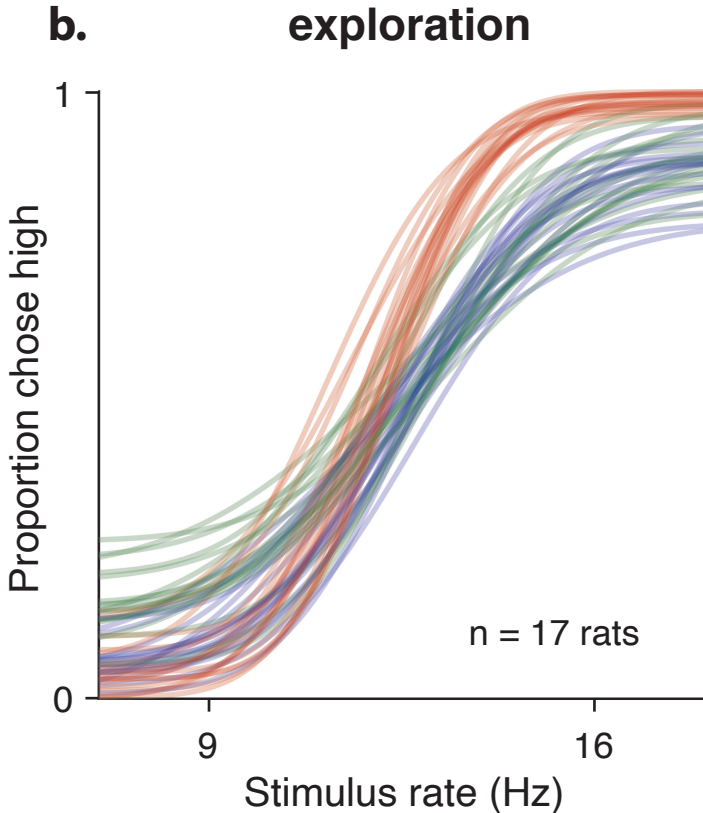

f.

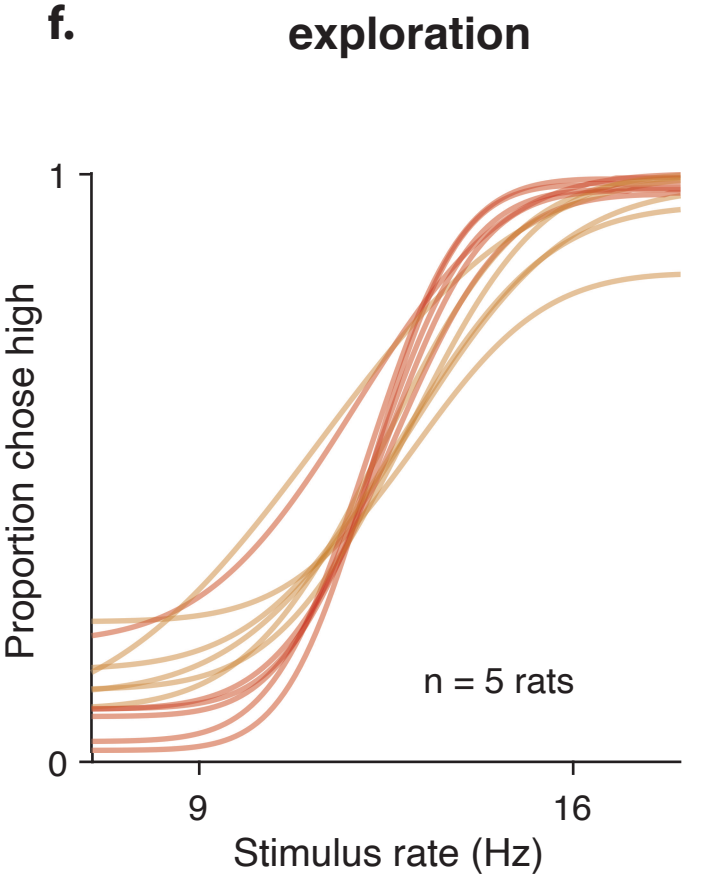

e.

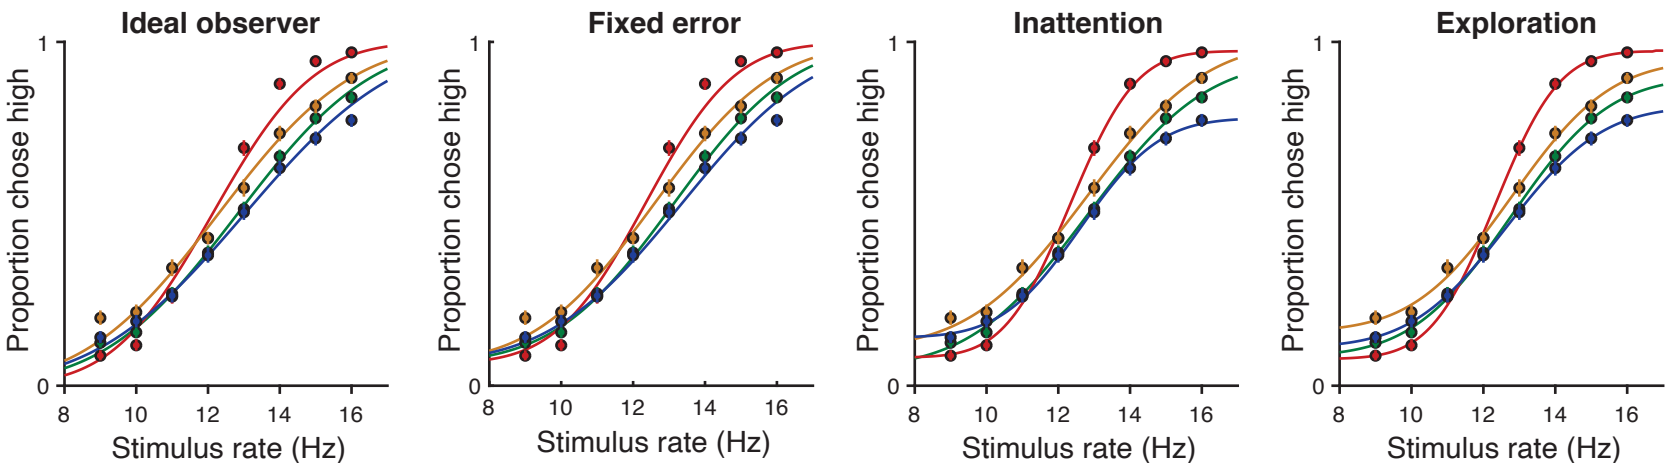

g.

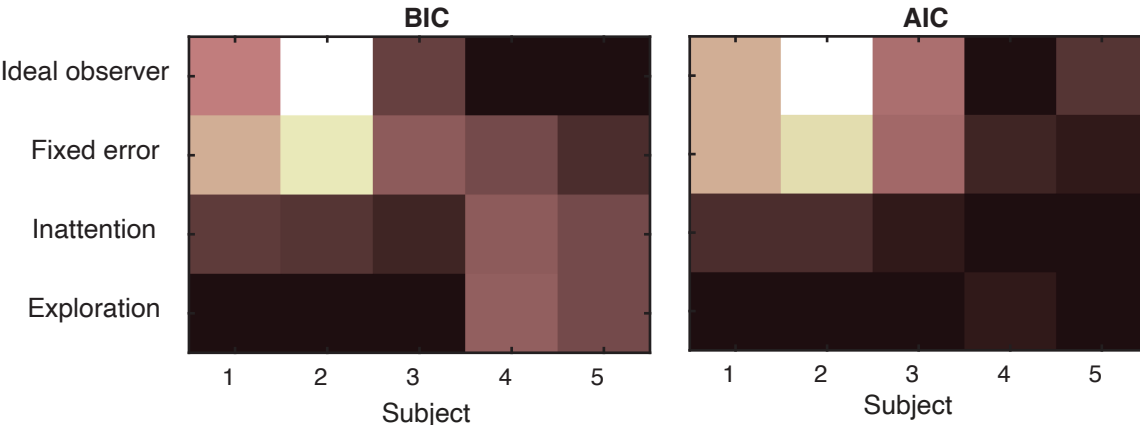

h.

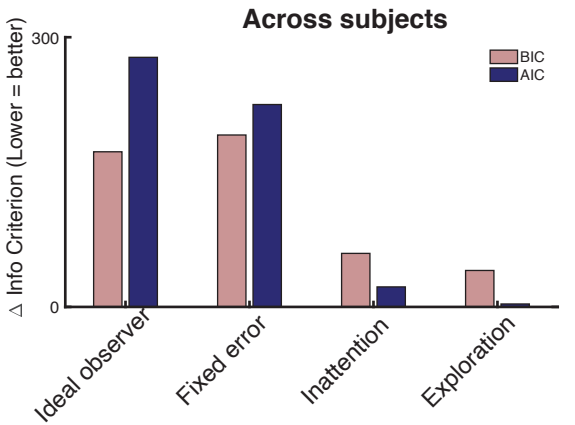

Supplement: supp [file elife-55490-supp-v1.zip]

**Figure 5 - Supplement 2**

**a**

**pStr**

Rat 1

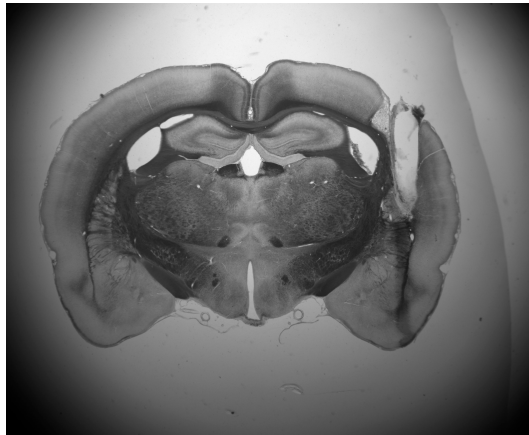

Rat 2

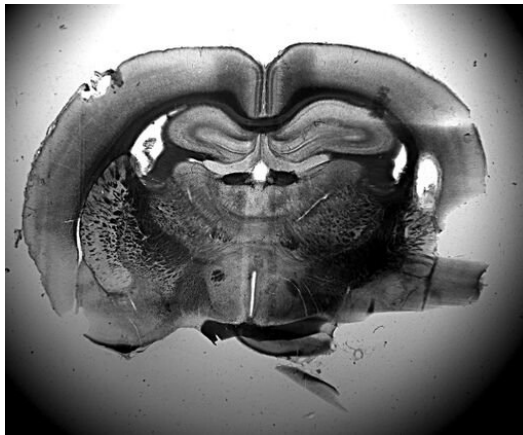

Rat 3

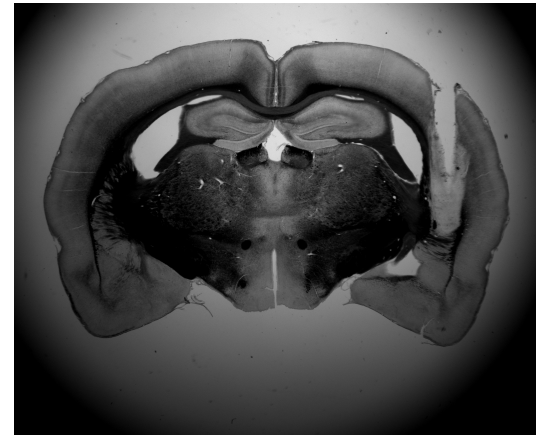

Rat 4

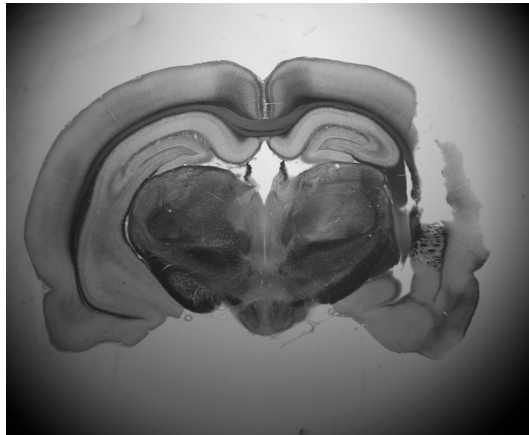

Rat 5

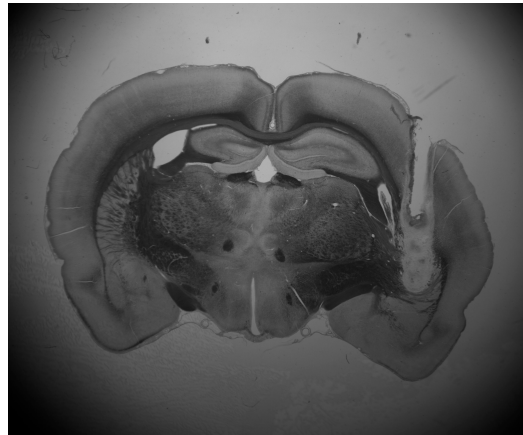

Rat 6

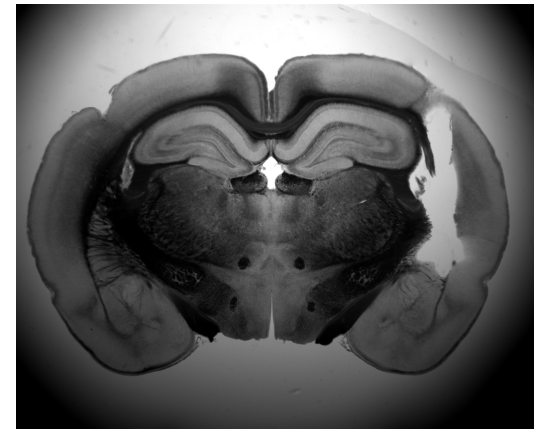

**b**

**M2**

Rat 7

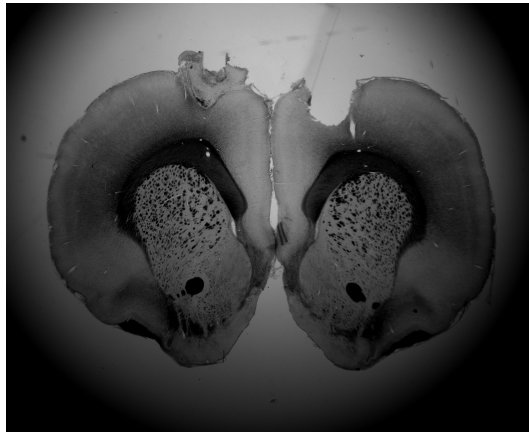

Rat 8

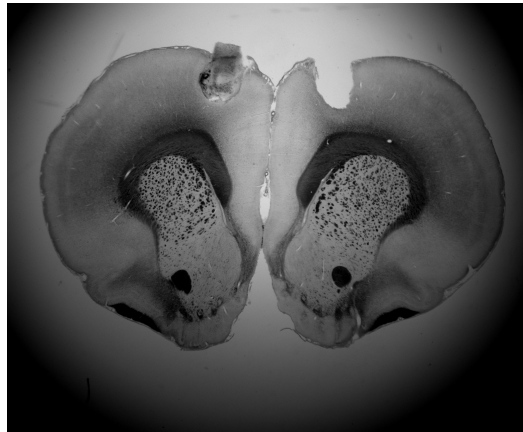

Rat 9

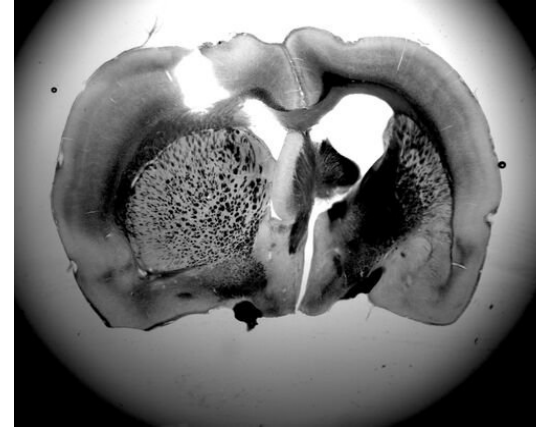

Rat 10

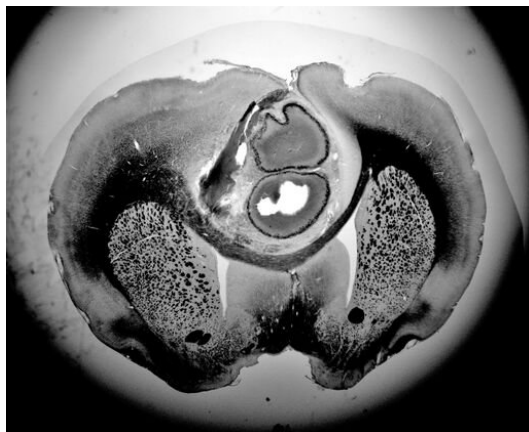

Rat 11

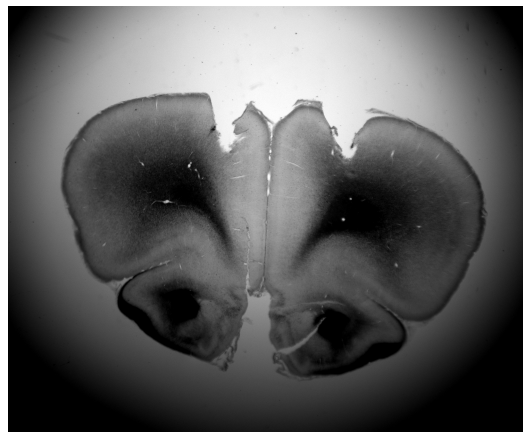

Supplement: supp [file elife-55490-supp-v1.zip]

Figure 5 - Supplement 7

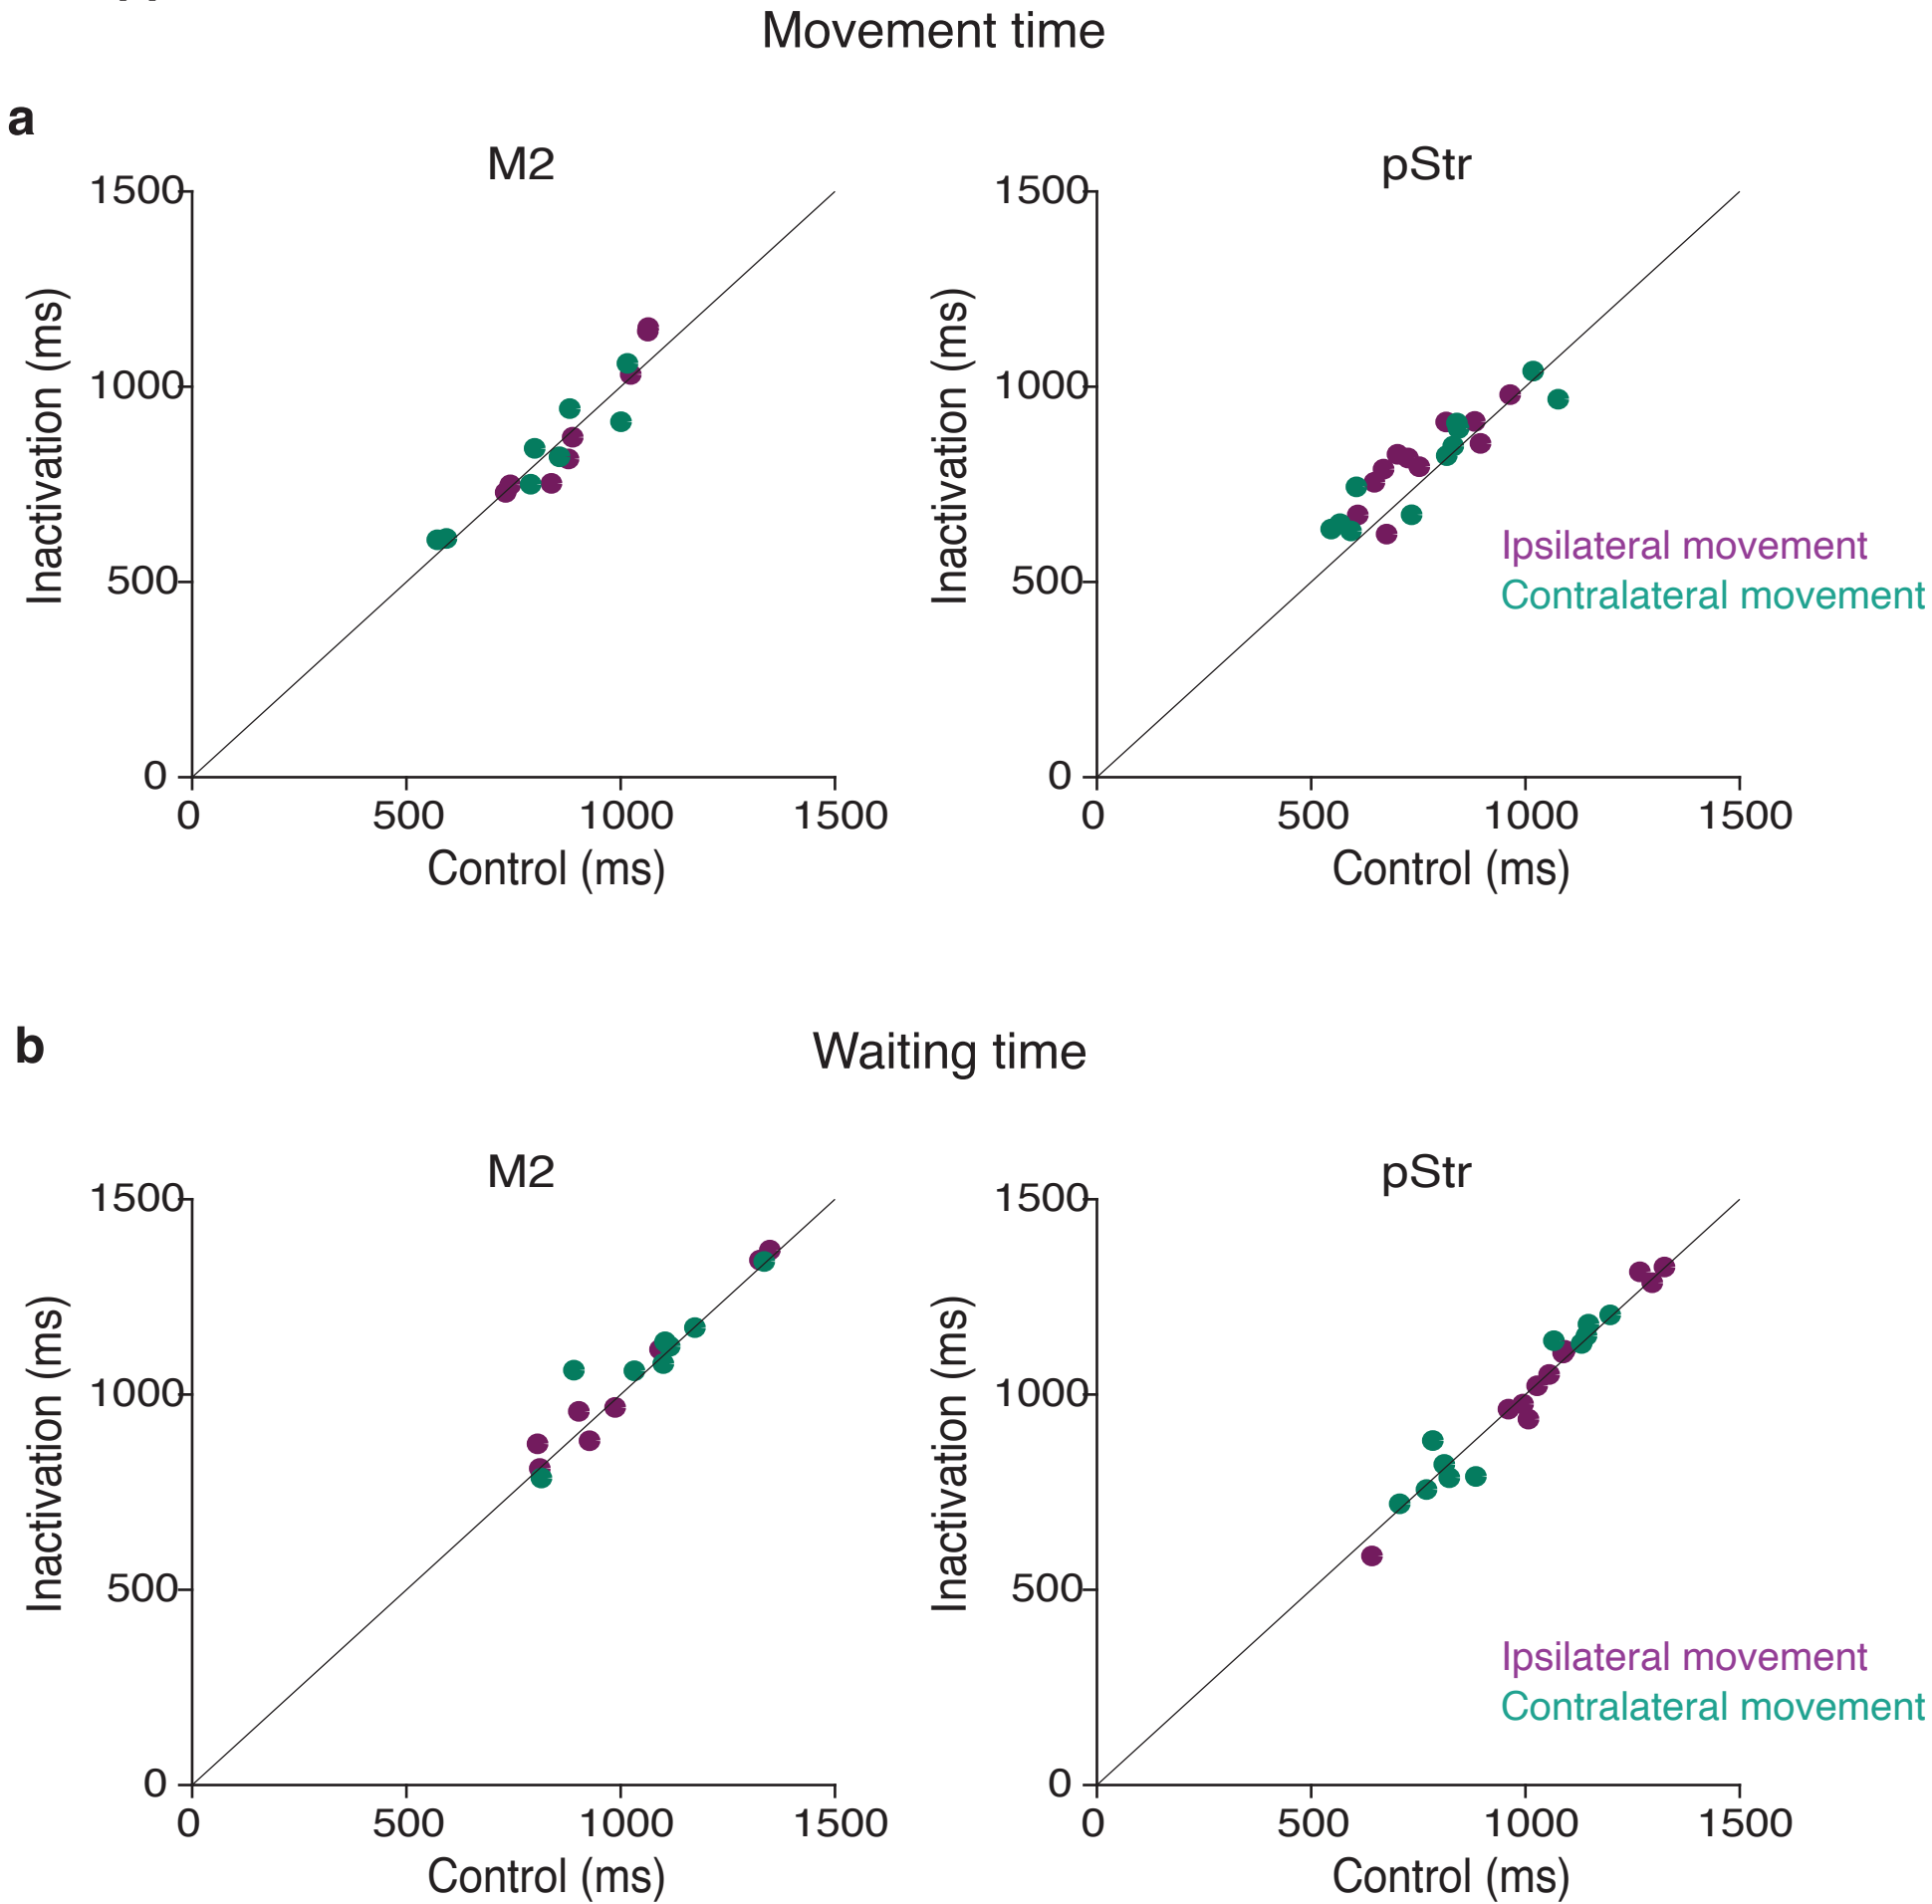

Supplement: supp [file elife-55490-supp-v1.zip]

Figure 5 - Supplement 5

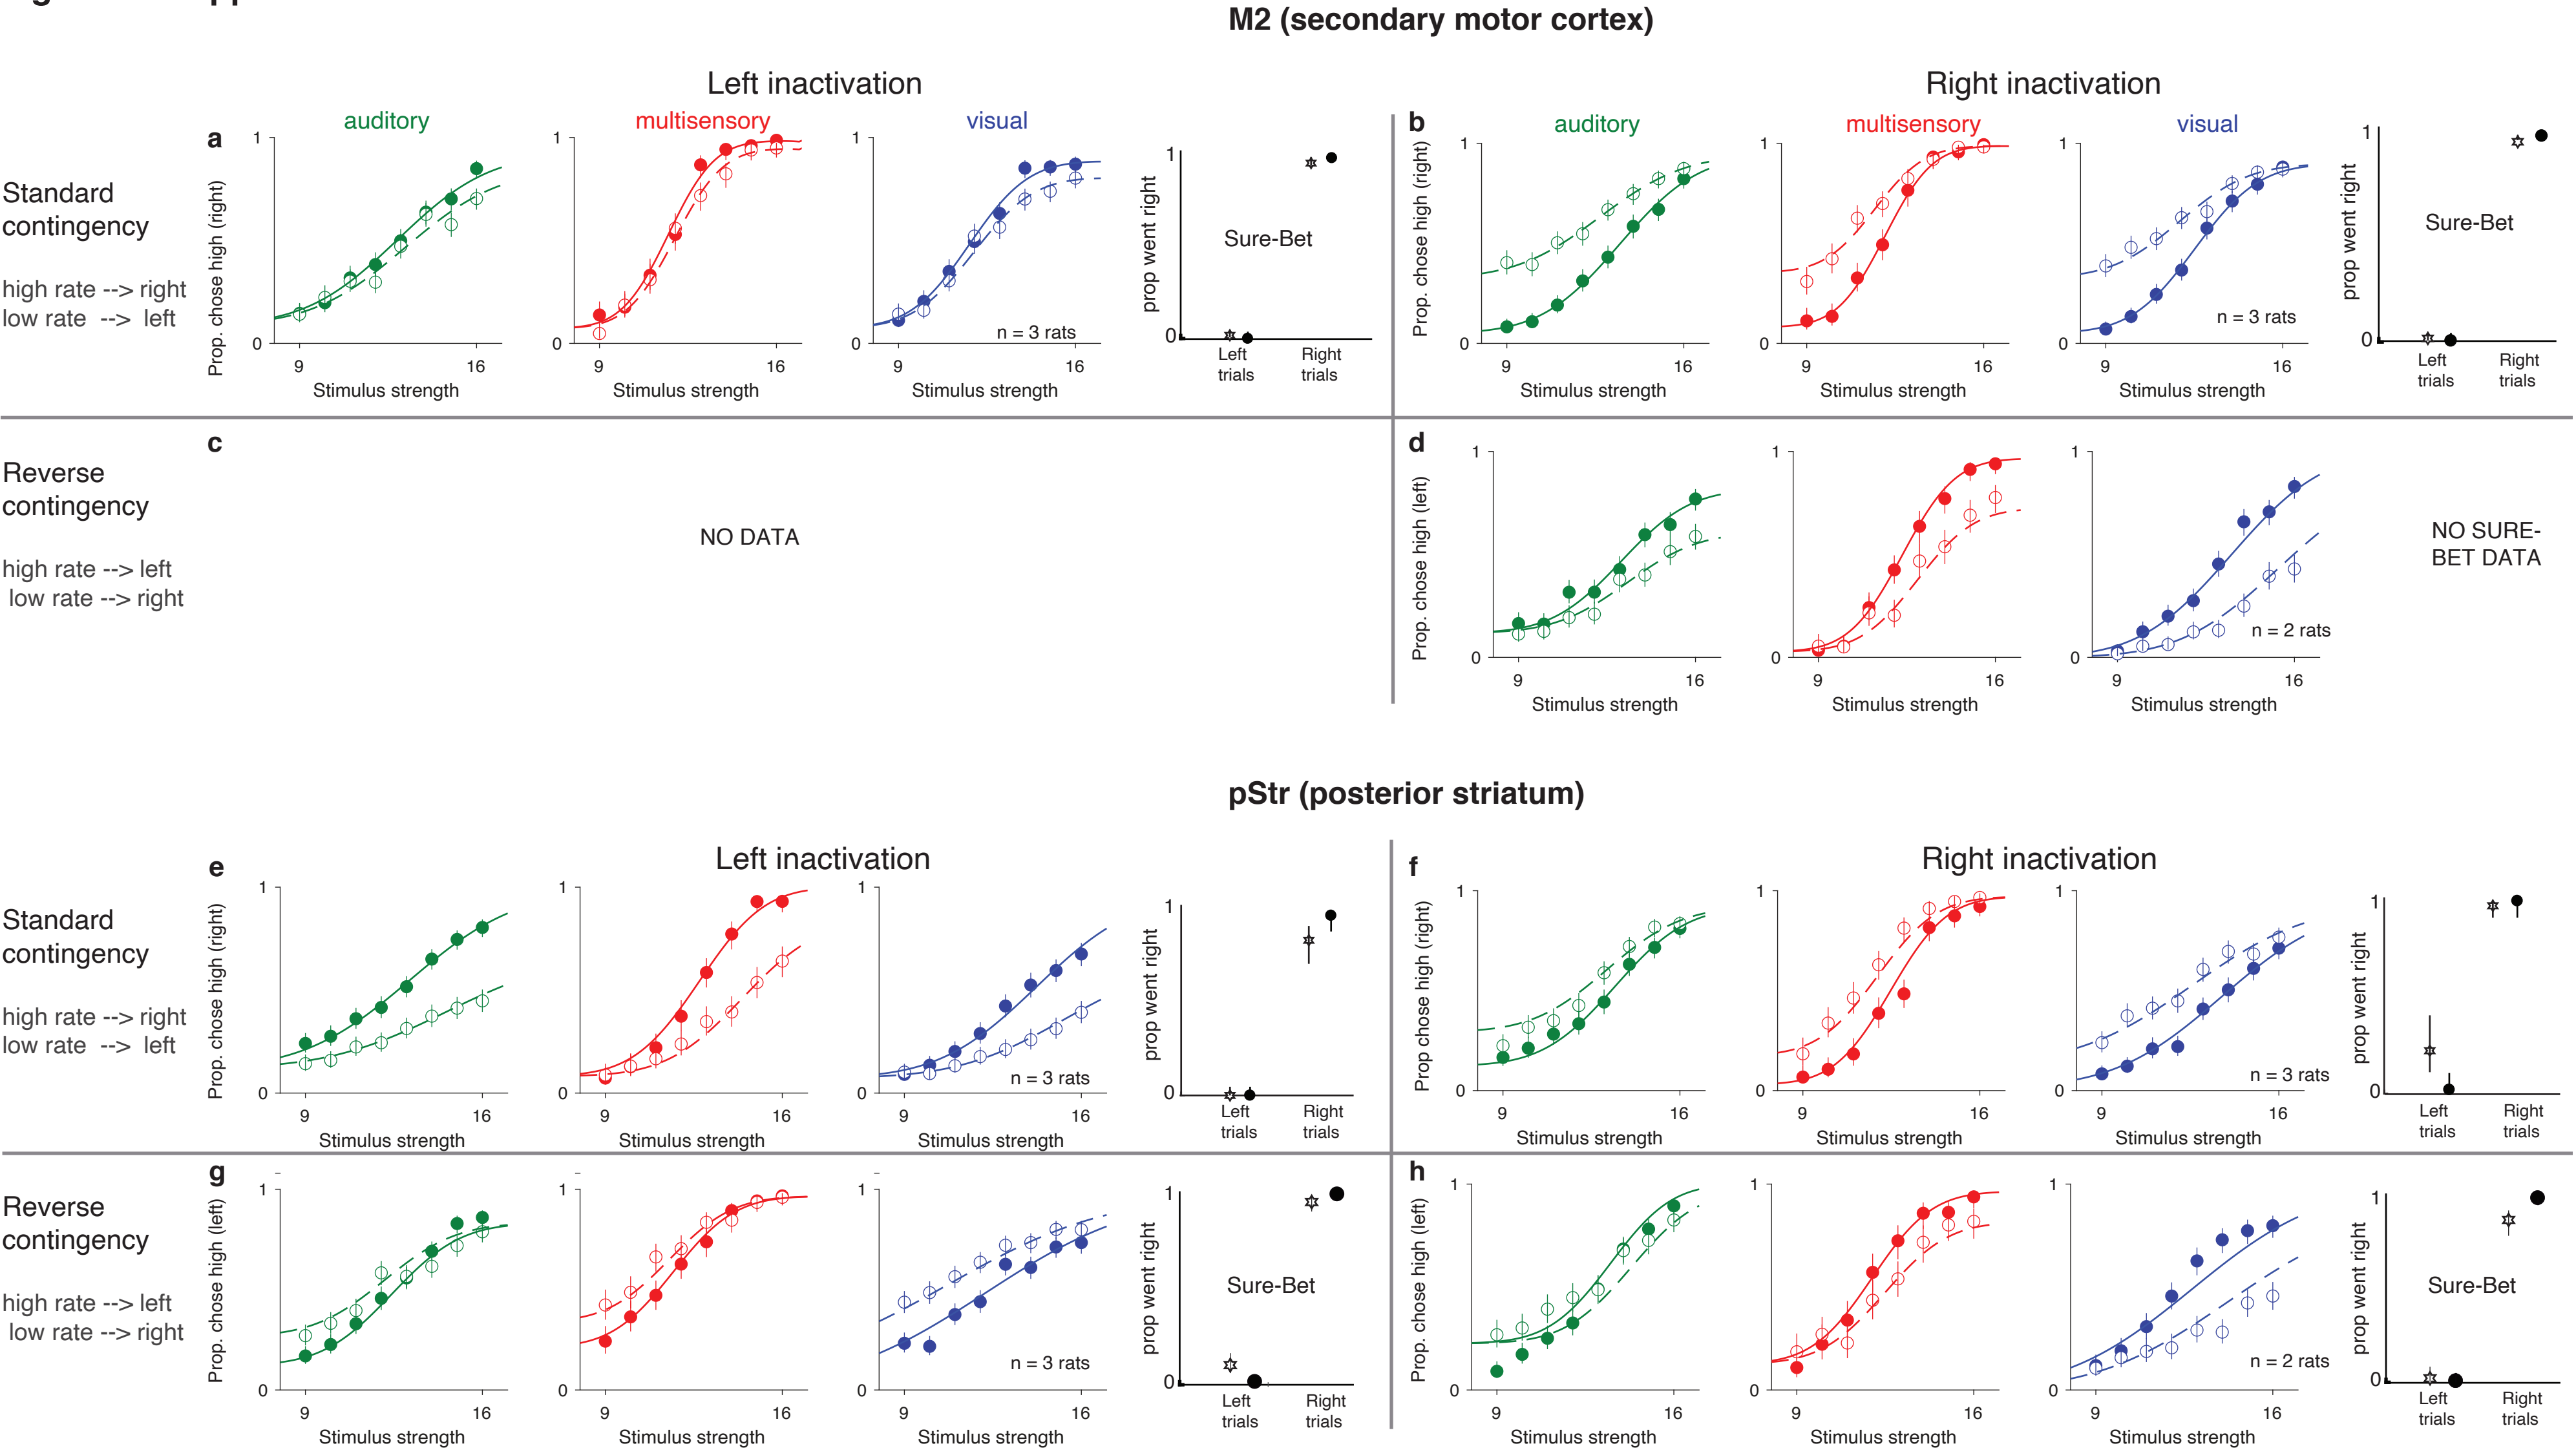

Supplement: supp [file elife-55490-supp-v1.zip]

# Figure 5 - Supplement 6

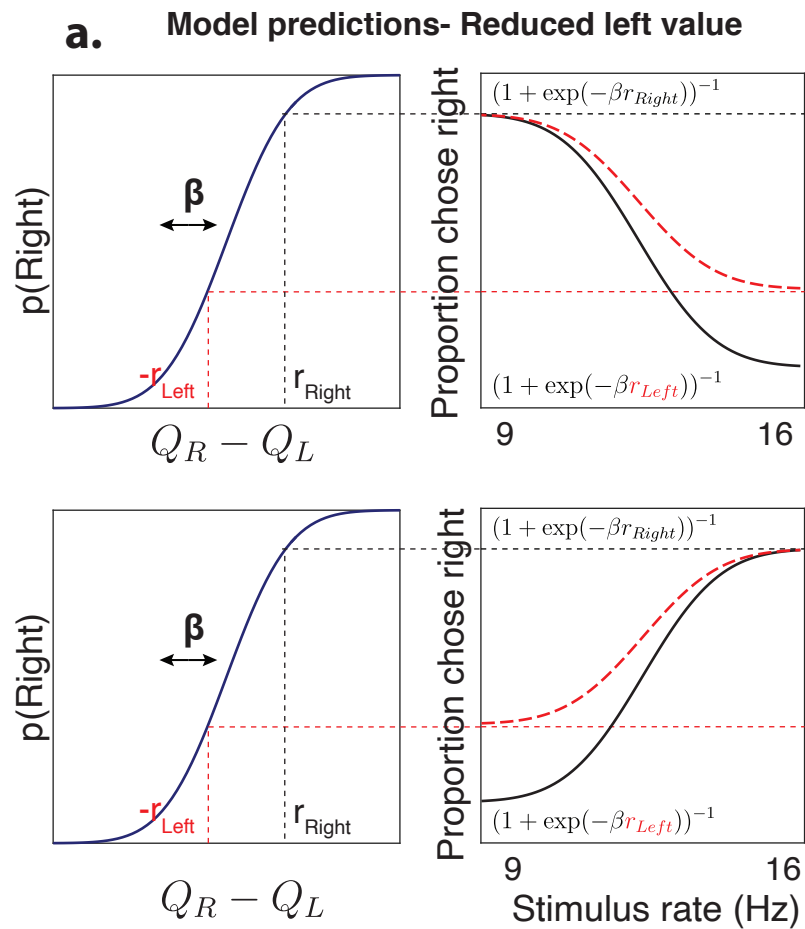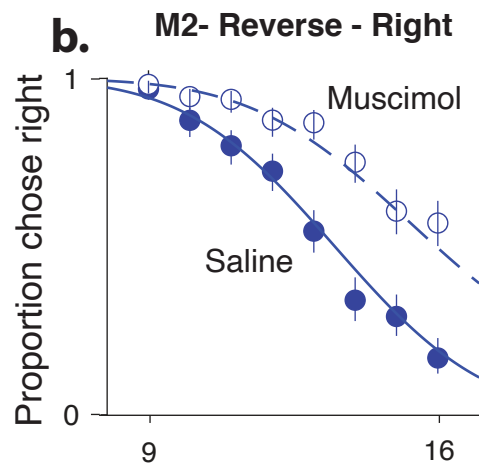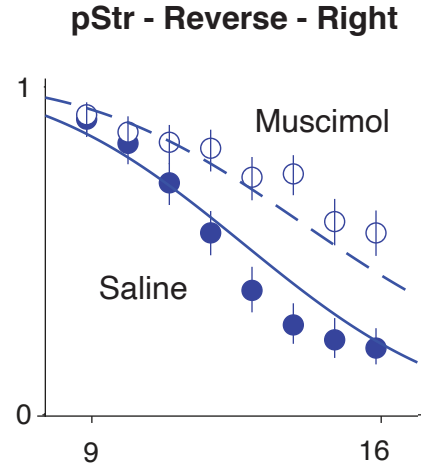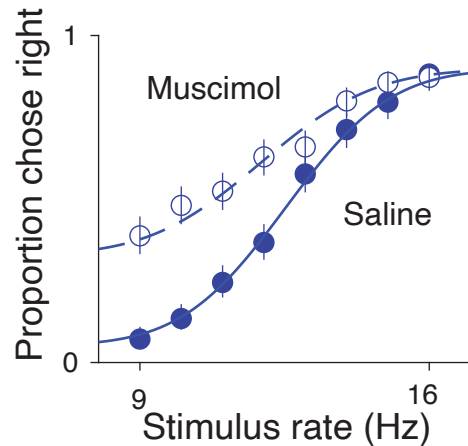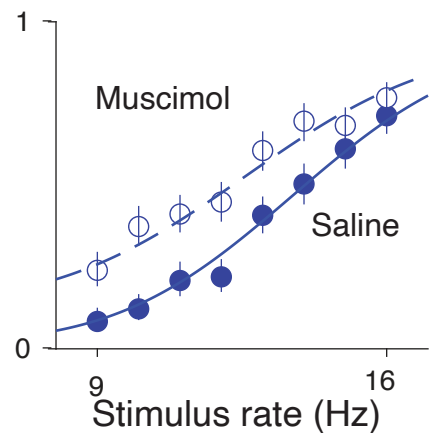

Supplement: supp [file elife-55490-supp-v1.zip]

Figure 4 - Supplement 2

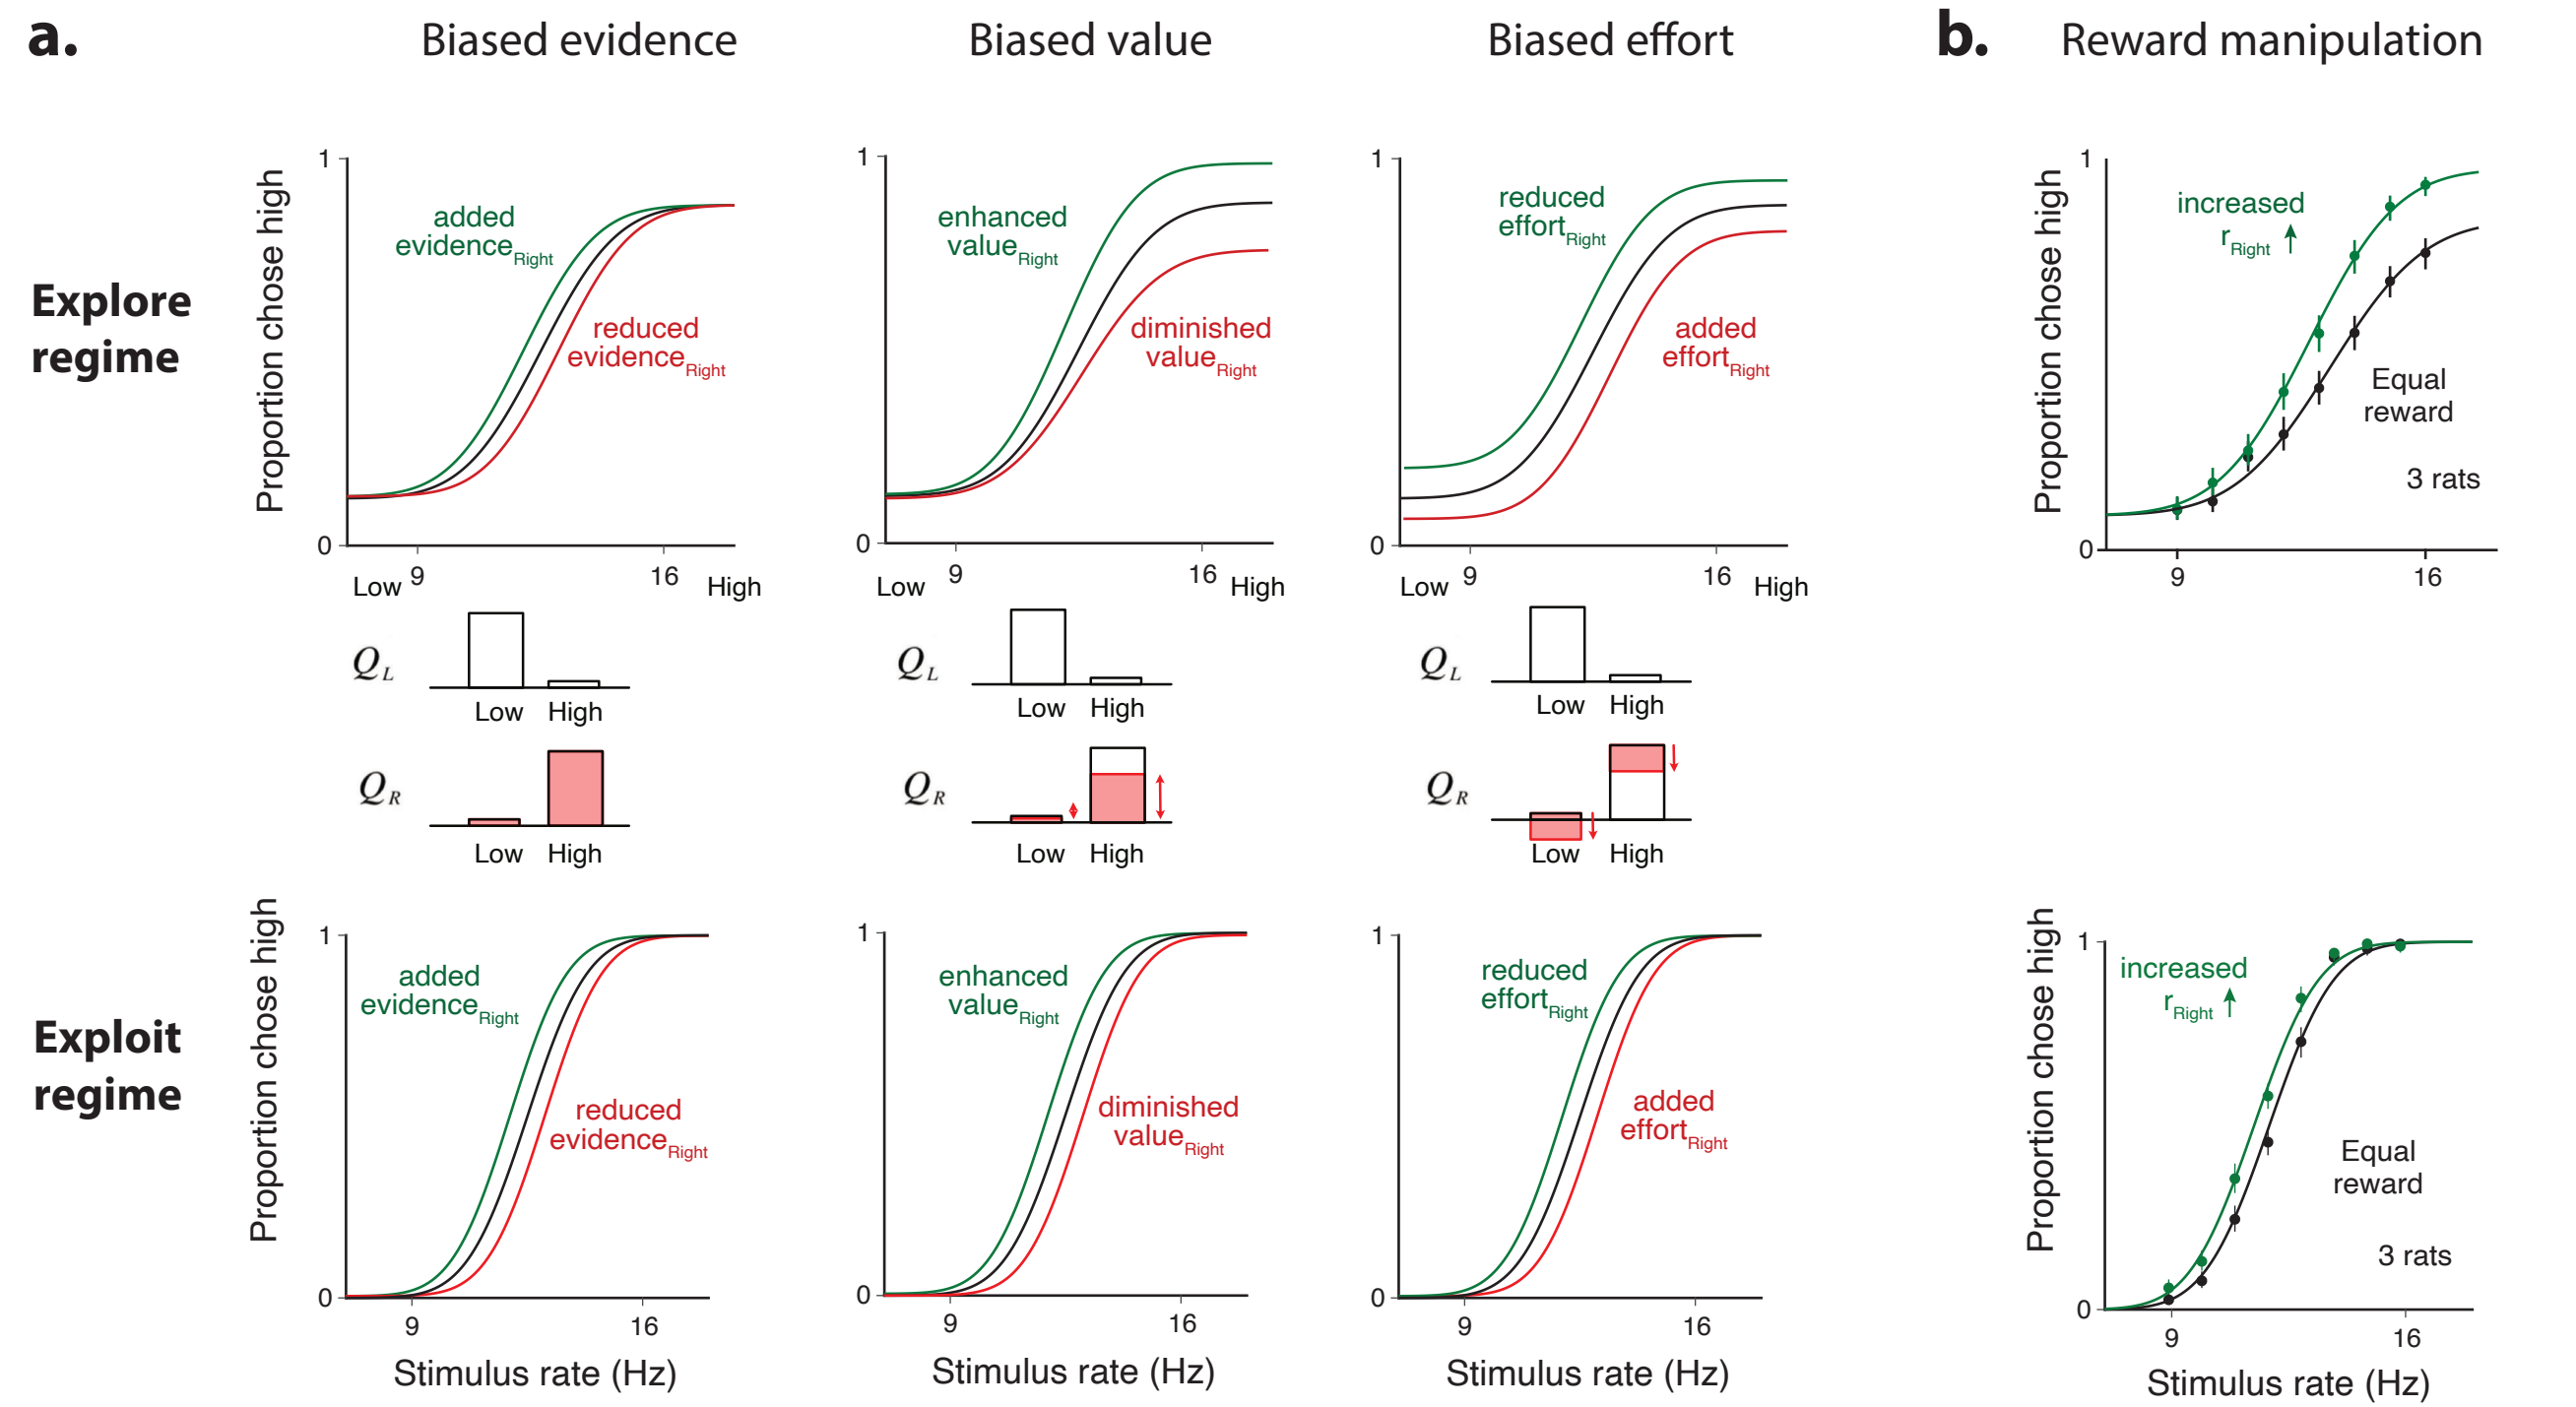

Supplement: supp [file elife-55490-supp-v1.zip]

Figure 5 - Supplement 3

M2 - low rate side inactivation

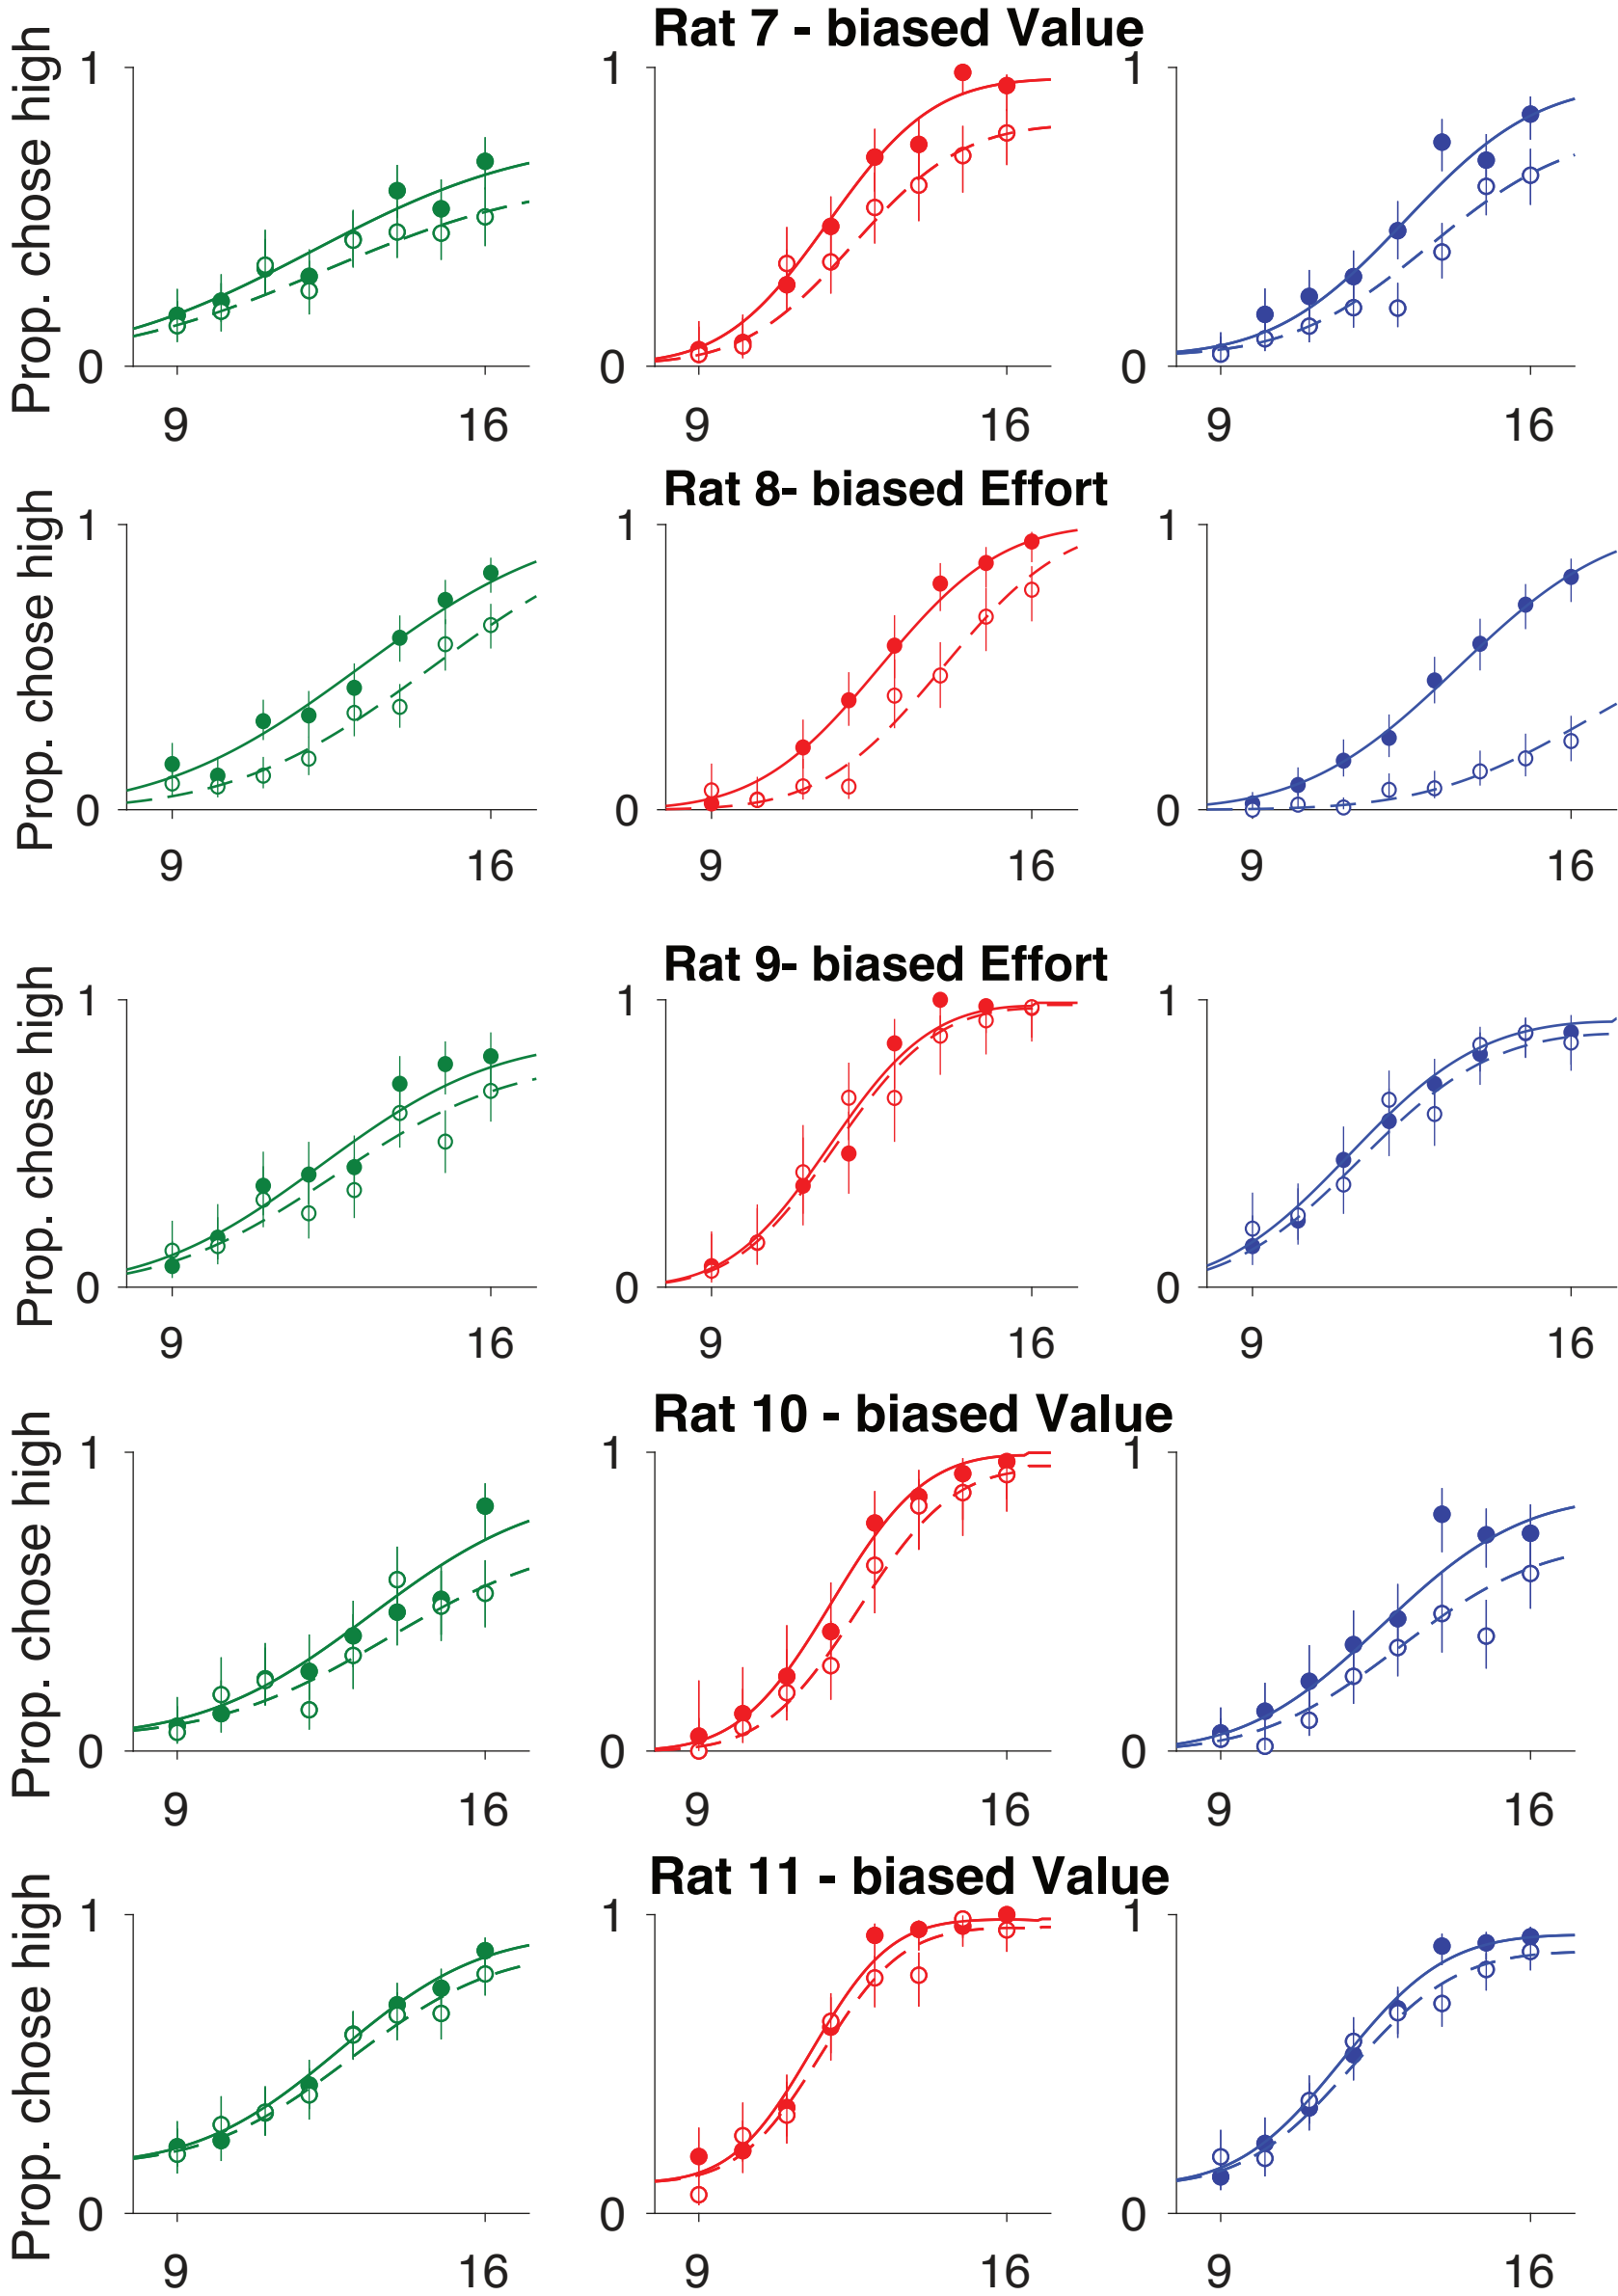

M2 - high rate side inactivation

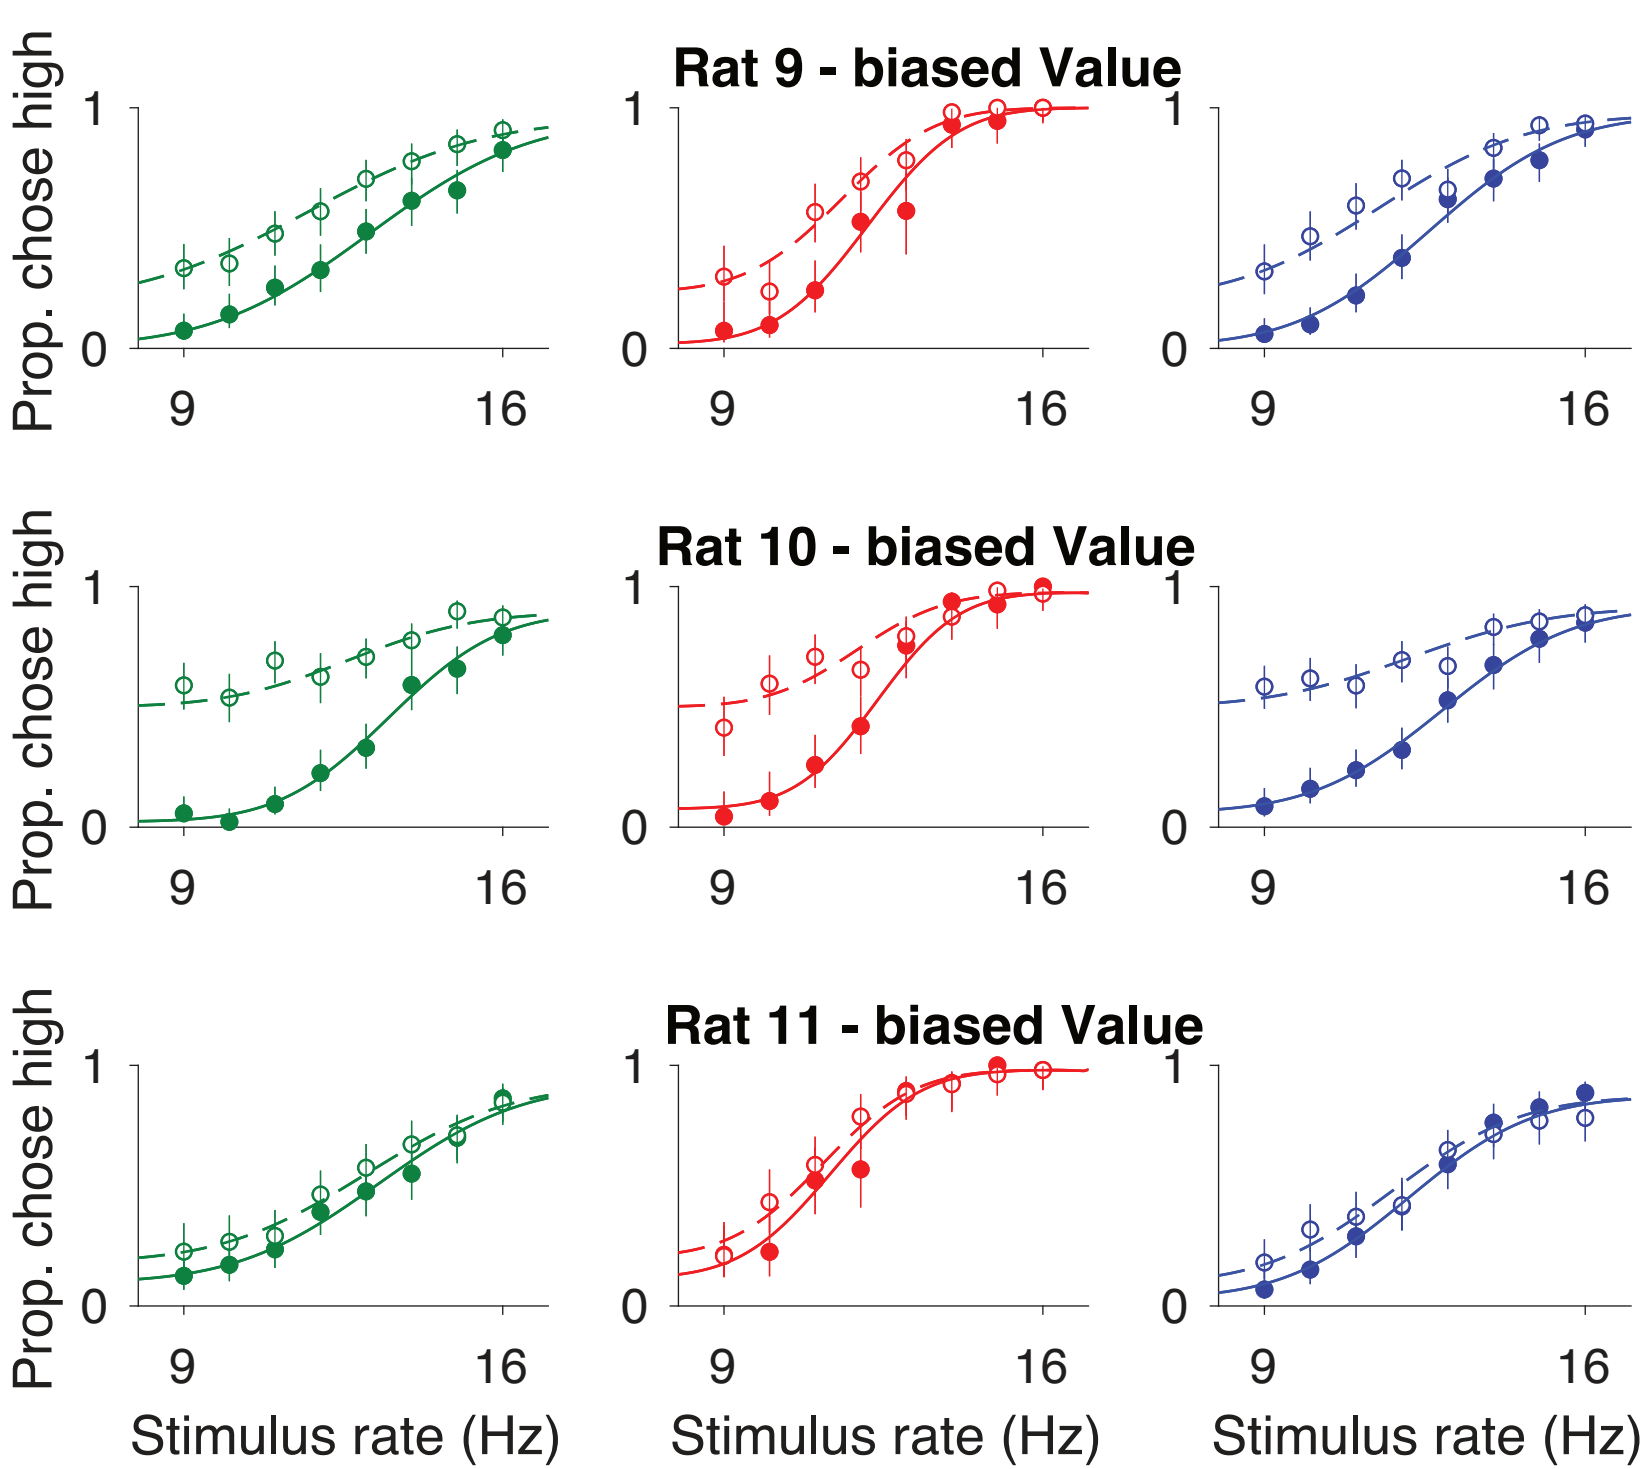

Supplement: supp [file elife-55490-supp-v1.zip]

Figure 5 - Supplement 4

pStr - low rate side inactivation

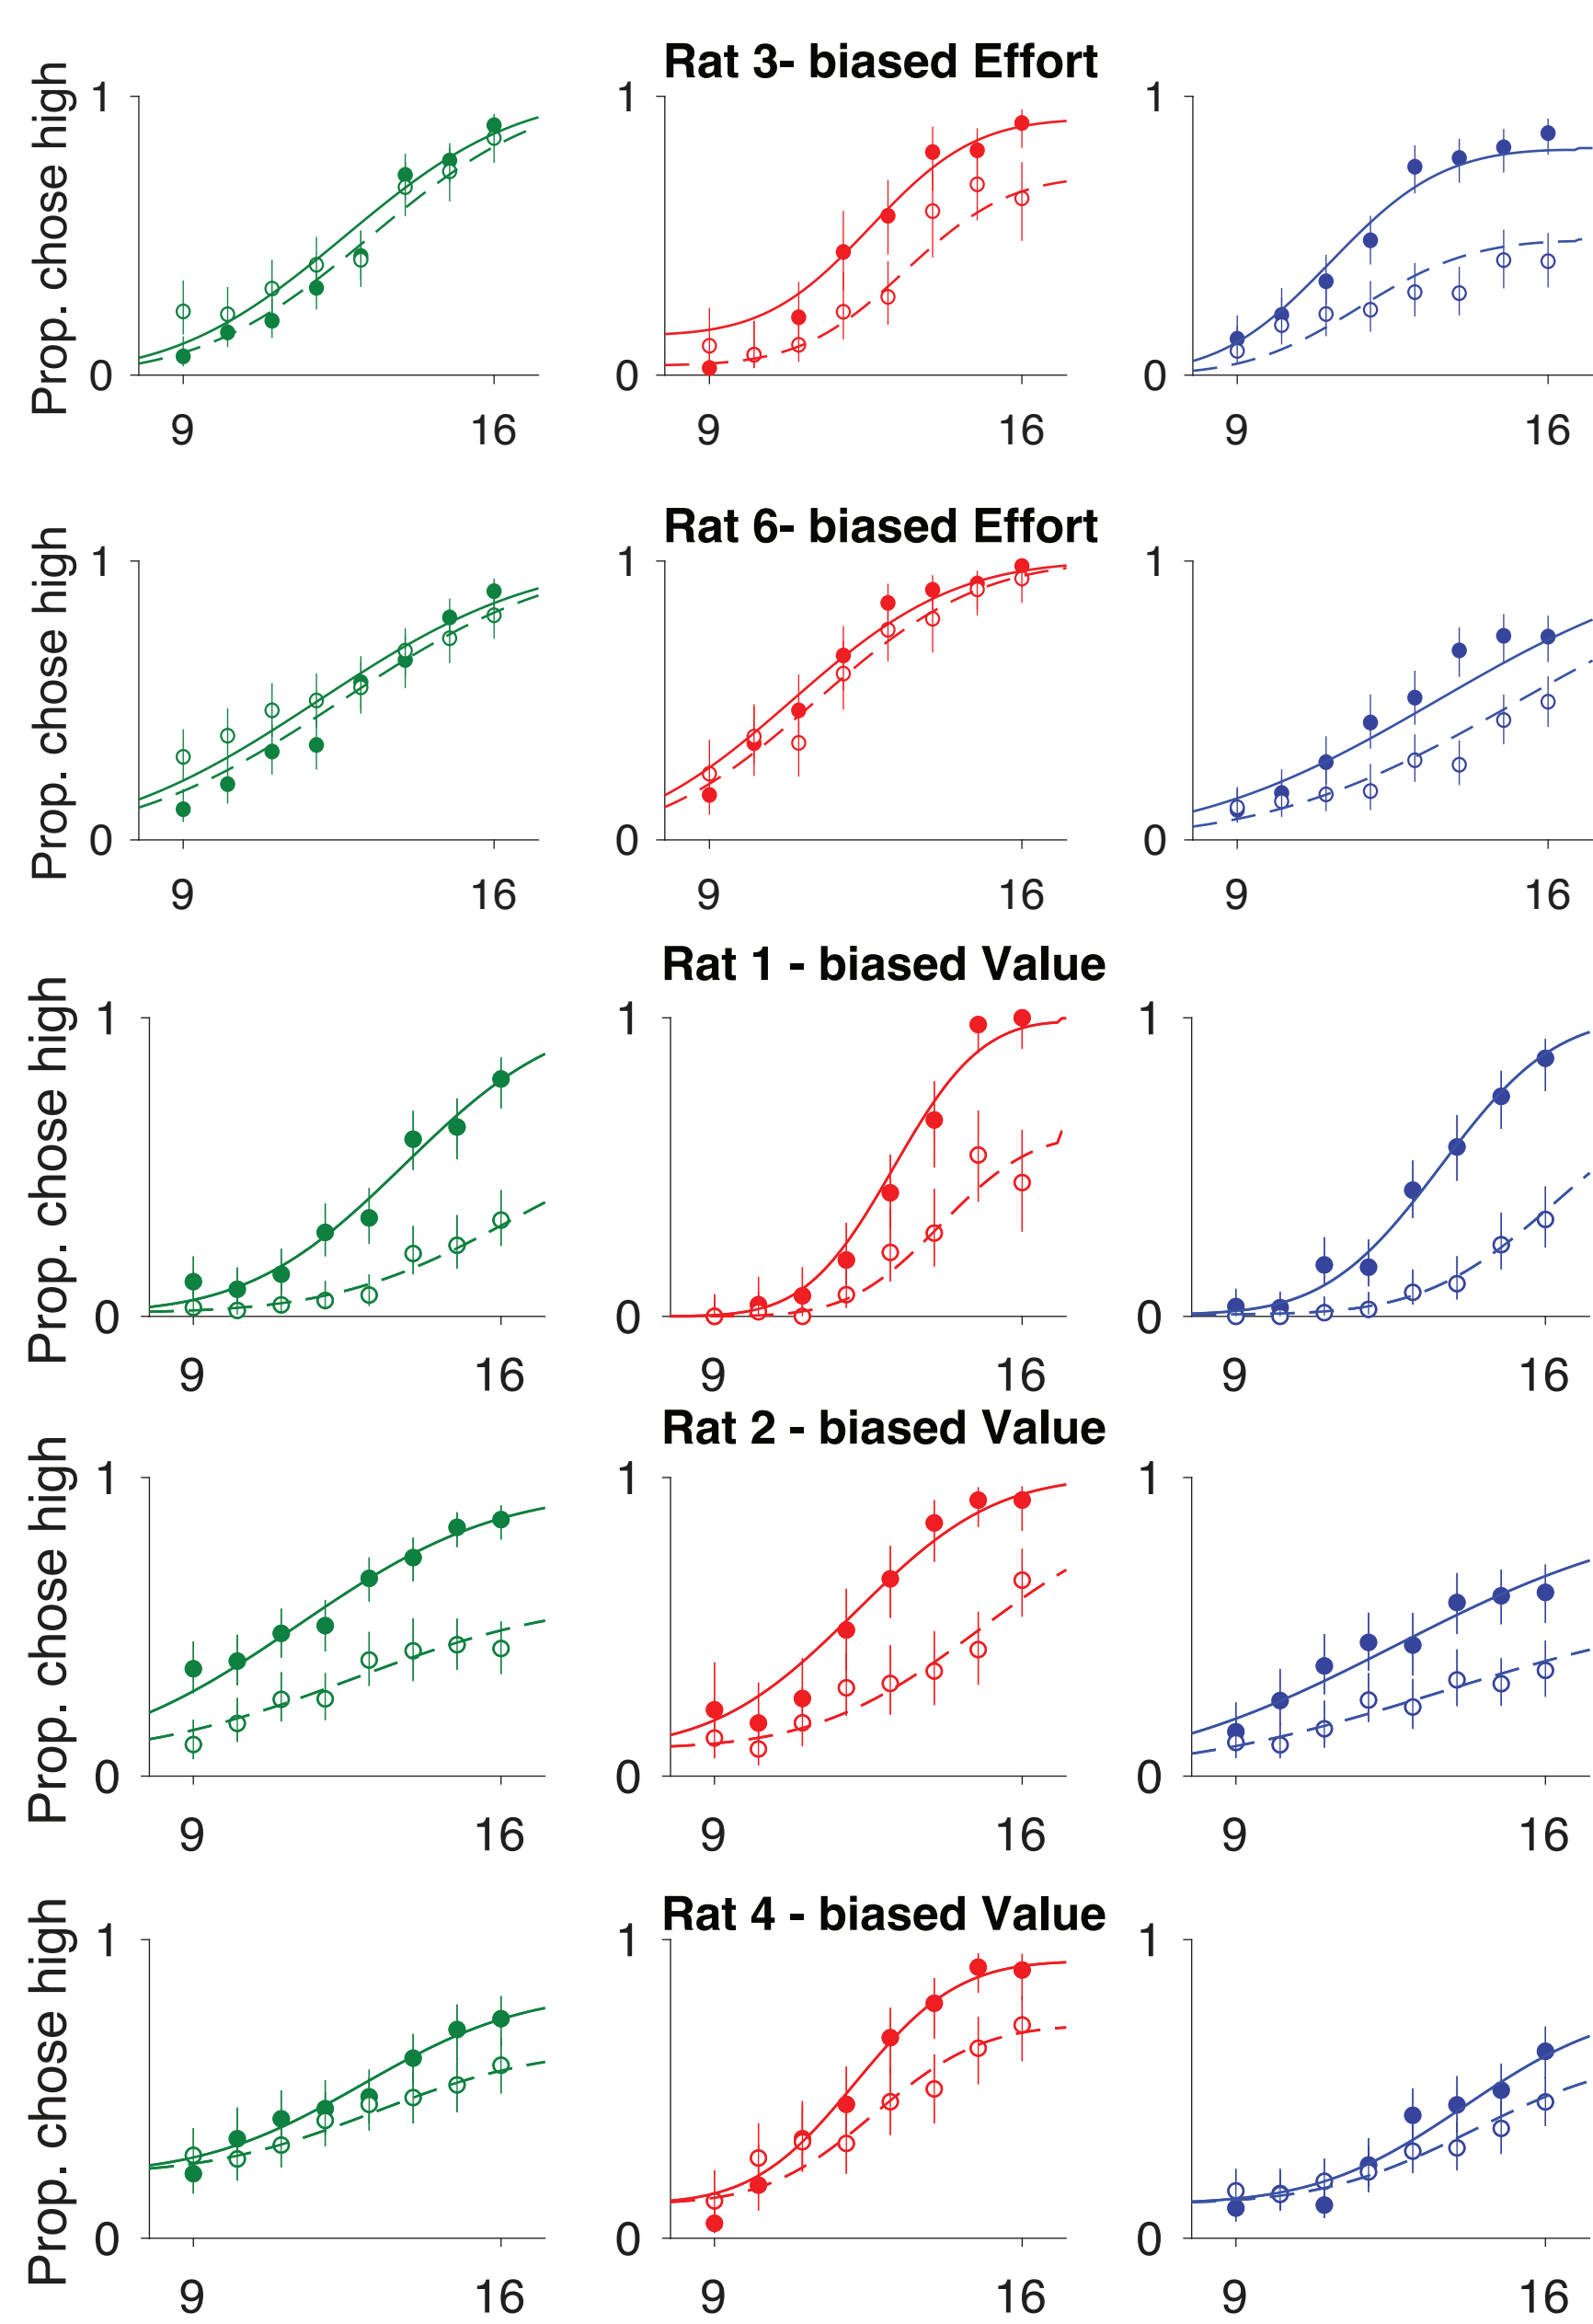

pStr - high rate side inactivation

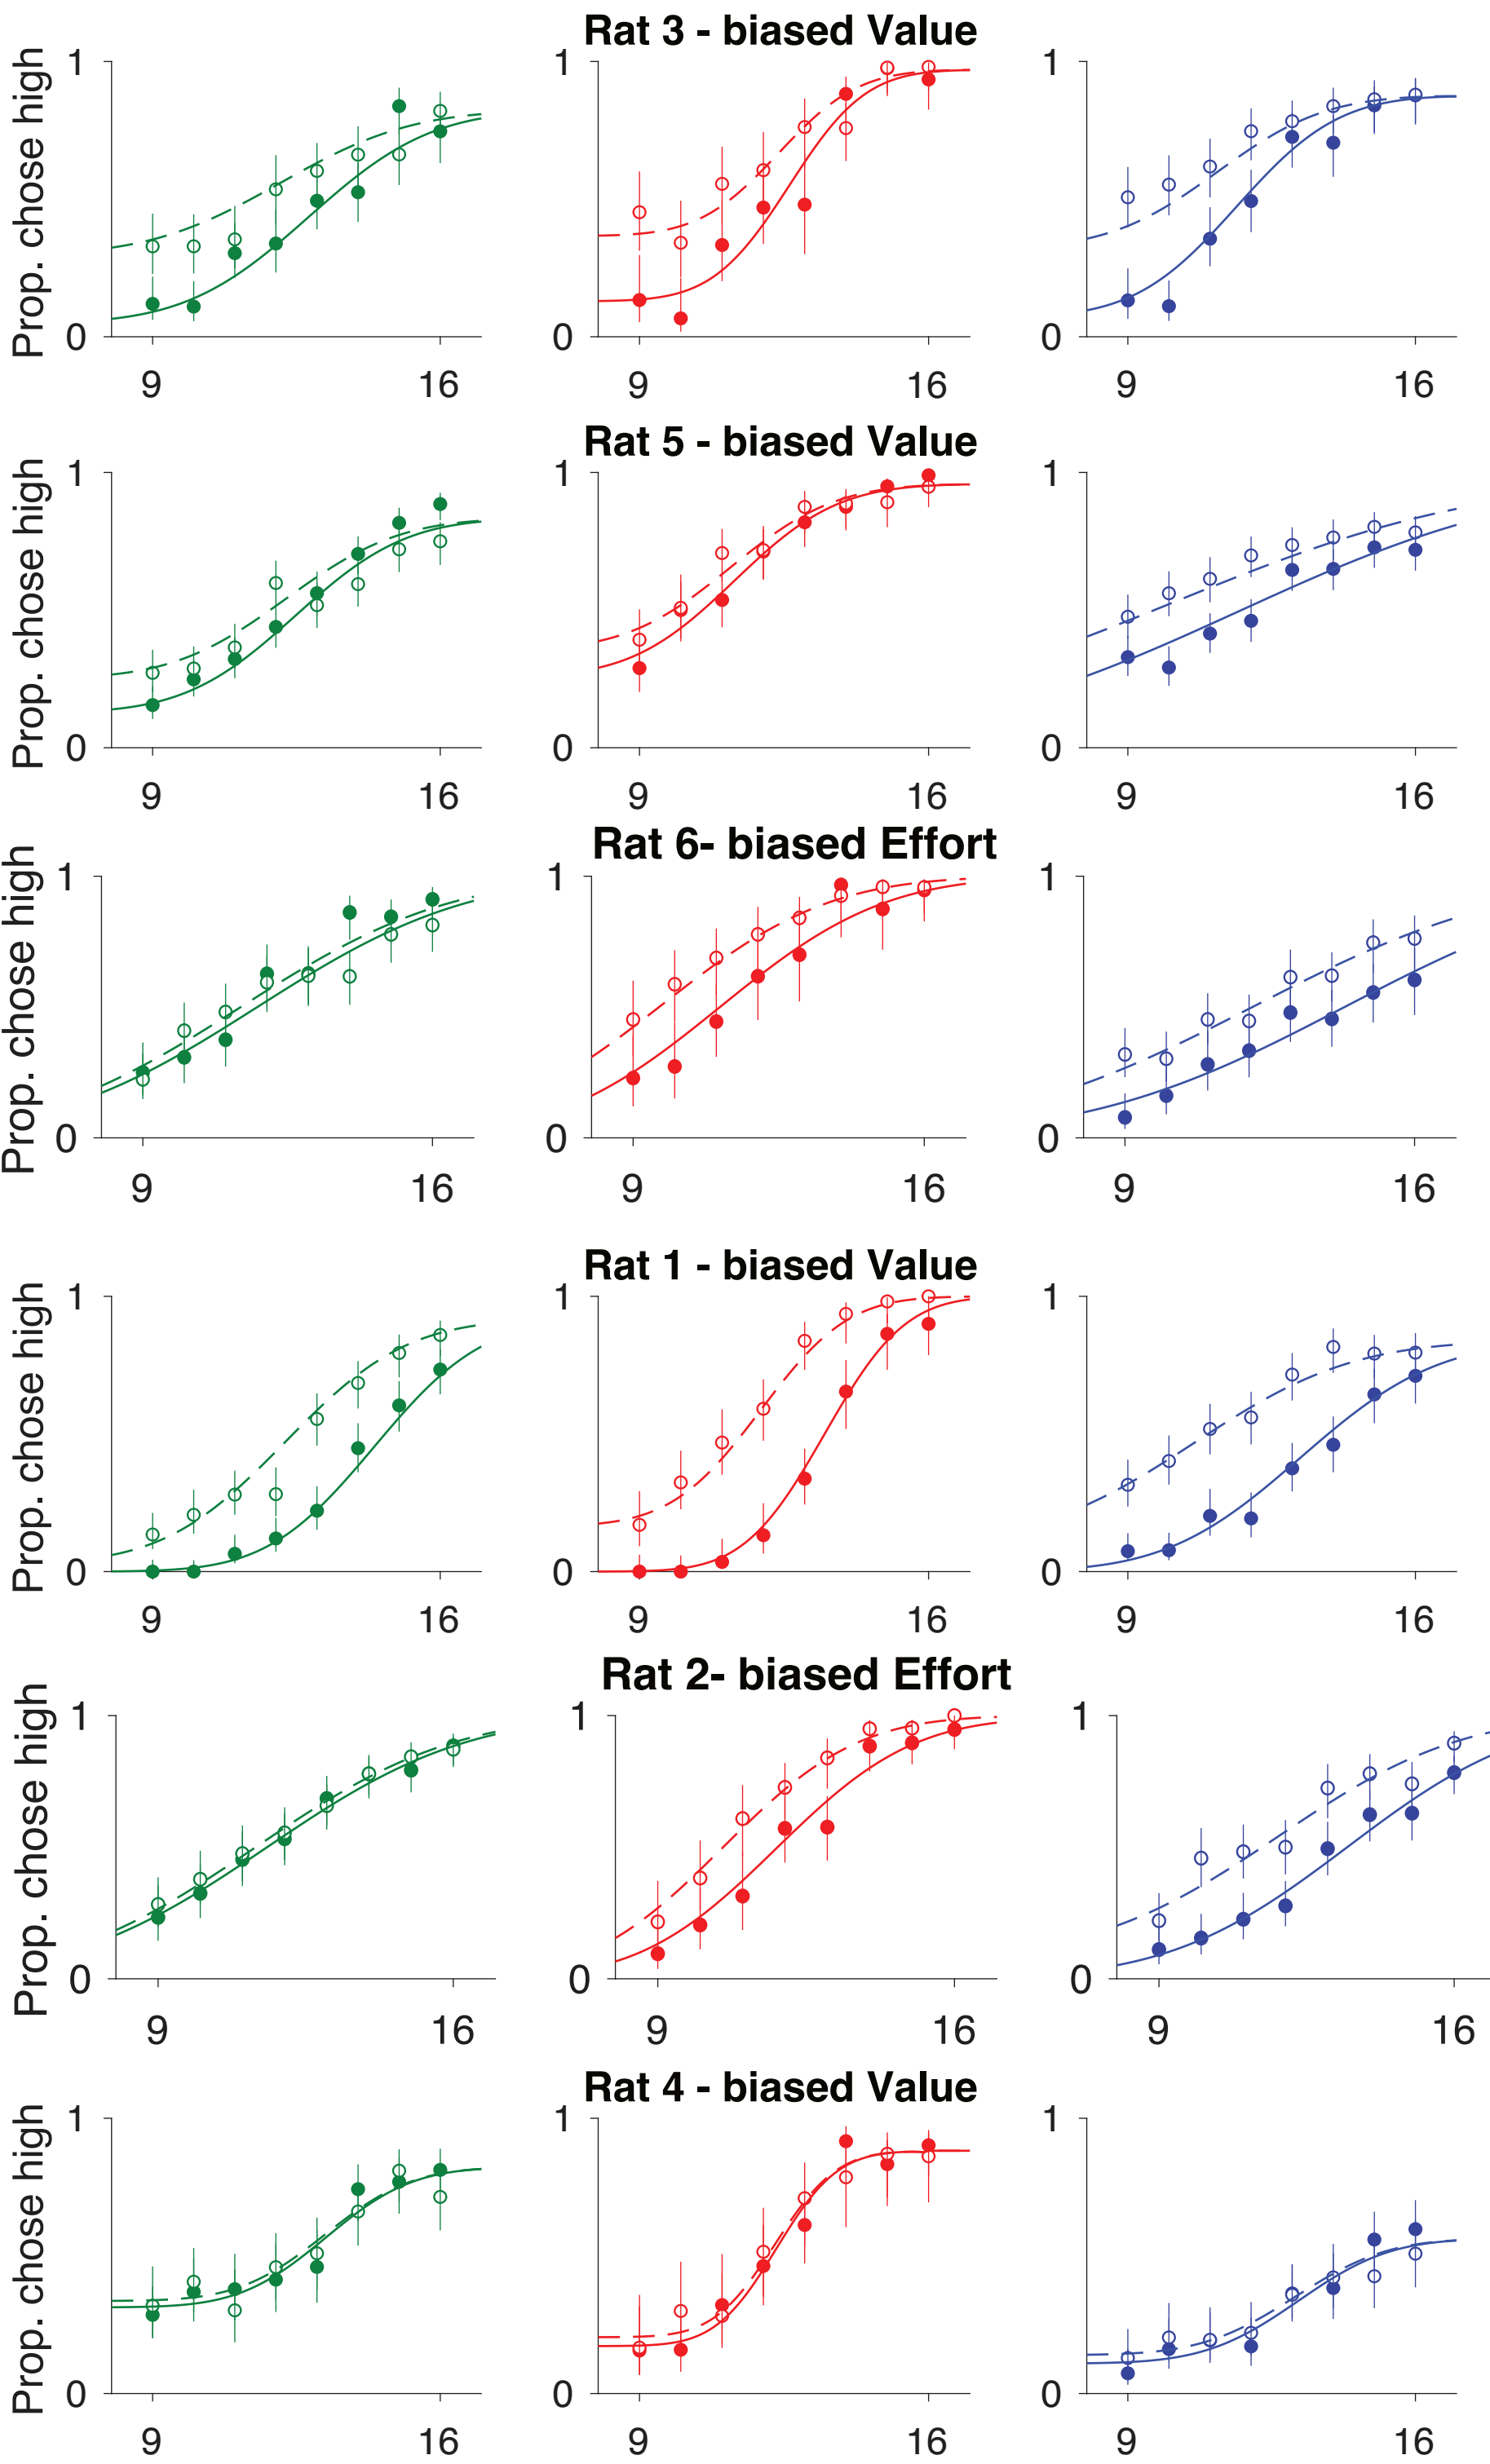

Supplement: supp [file elife-55490-supp-v1.zip]
